1 **Interferon-induced Protein-44 and Interferon-induced Protein 44-like restrict**  
2 **replication of Respiratory Syncytial Virus**

3 D. C. Busse<sup>1</sup>, D. Habgood-Coote<sup>1</sup>, S. Clare<sup>2</sup>, C. Brandt<sup>2</sup>, I. Bassano<sup>1</sup>, M. Kaforou<sup>1</sup>, J.  
4 Herberg<sup>1</sup>, M. Levin<sup>1</sup>, Jean-Francois Eleouet<sup>3</sup>, P. Kellam<sup>1, 4</sup>, J. S. Tregoning<sup>1</sup>

5

6 <sup>1</sup>Department of Infectious Disease, Imperial College London, St. Mary's Campus, London,  
7 United Kingdom.

8

9 <sup>2</sup>Wellcome Trust Sanger Institute, Wellcome Trust Genome Campus, Hinxton, United  
10 Kingdom.

11

12 <sup>3</sup>Unité De Virologie et Immunologie Moléculaires (UR892), INRA), Université Paris-Saclay,  
13 78350 Jouy-en-Josas, France

14

15 <sup>4</sup>Kymab Ltd, The Bennet Building (B930), Babraham Research Campus, Cambridge, United  
16 Kingdom.

17

18 Contact information for corresponding author: [john.tregoning@imperial.ac.uk](mailto:john.tregoning@imperial.ac.uk)

19

20 Key words: IFI44, restriction factor, innate immunity, RSV, intrinsic immunity

21 Word count main text: 3434

22 Word count abstract: 159

23 Running head: IFI44 and IFI44L restrict RSV

24 **Abstract**

25 Cellular intrinsic immunity, mediated by the expression of an array of interferon-  
26 stimulated antiviral genes, is a vital part of host defence. We have previously used a  
27 bioinformatic screen to identify two interferon stimulated genes (ISG) with poorly  
28 characterised function, Interferon-induced protein 44 (IFI44) and interferon-induced  
29 protein 44-like (IFI44L), as potentially being important in Respiratory Syncytial Virus  
30 (RSV) infection. Using overexpression systems, CRISPR-Cas9-mediated knockout,  
31 and a knockout mouse model we investigated the antiviral capability of these genes  
32 in the control of RSV replication. Over-expression of IFI44 or IFI44L was sufficient to  
33 restrict RSV infection at an early time post infection. Knocking out these genes in  
34 mammalian airway epithelial cells increased levels of infection. Both genes express  
35 antiproliferative factors that have no effect on RSV attachment but reduce RSV  
36 replication in a minigenome assay. The loss of *Ifi44* was associated with a more  
37 severe infection phenotype *in vivo*. These studies demonstrate a function for IFI44  
38 and IFI44L in controlling RSV infection.

39 **Importance**

40 RSV infects all children under two years of age, but only a subset of children get  
41 severe disease. We hypothesize that susceptibility to severe RSV necessitating  
42 hospitalization in children without pre-defined risk factors is in part mediated at the  
43 anti-viral gene level. But there is a large array of anti-viral genes, particularly in the  
44 ISG family about which the mechanism is poorly understood. Having observed  
45 significantly lower levels of IFI44 and IFI44L gene expression in hospitalized children  
46 with a confirmed diagnosis of RSV, we dissected the function of these two genes.  
47 Through a range of over-expression and knockout studies we show that the genes  
48 are anti-viral and anti-proliferative. This study is important because IFI44 and IFI44L  
49 are upregulated after a wide range of viral infections and IFI44L can serve as a  
50 diagnostic bio-marker of viral infection.

## 51 **Introduction**

52 Respiratory syncytial virus (RSV) is a major global cause of morbidity in young  
53 children and the elderly, representing a significant burden on healthcare  
54 infrastructure (1). The majority of RSV infections in susceptible populations are self-  
55 limiting, however some 2% of infected infants develop a severe infection and require  
56 hospitalisation. The risk factors behind this development of severe RSV disease  
57 have yet to be fully elucidated and some 75% of hospitalised infants present with no  
58 known risk factor (2, 3). This suggests that there is a genetic element to susceptibility  
59 to symptomatic infection and since ISGs are vital in early viral control, they are a  
60 likely candidate. A number of ISG have been demonstrated to inhibit RSV including  
61 IFITM proteins (4, 5) TDRD7 (6), and 2'-5' oligoadenylate synthetase (7).

62 A vital component of the innate host response to viral infection is the intracellular  
63 amplification of an array of antiviral proteins in response to type I interferon (IFN).  
64 The majority of these inducible proteins, encoded by IFN-stimulated genes (ISGs),  
65 have no defined function and have only been poorly characterised in terms of their  
66 antiviral tropism. Understanding how these genes reduce viral infection gives insight  
67 into the viral life cycle and may open up novel therapeutic routes. We have  
68 previously performed a bioinformatic screen of ISG expressed after RSV infection,  
69 which prioritised ISG of interest for further study (8).

70 Two ISGs of interest identified in our previous work are *IFI44* and *IFI44L*, which are  
71 found adjacently on chromosome one. *IFI44L* is a larger gene of 26 kilobases (kb)  
72 compared to the 14 kb of *IFI44*, but both genes encode similar sized proteins  
73 translated from a transcript produced from nine exons. *IFI44* is made up of 444  
74 amino acids whereas *IFI44L* has 452 residues: the two proteins share 45% amino

75 acid identity. *IFI44*, previously known as *MTAP44*, was first identified in the context  
76 of Hepatitis C virus infection (9, 10). Overexpression of IFI44 has been shown to  
77 restrict Bunyamwera virus (11), and HIV-1 (12) infection *in vitro*. IFI44 was initially  
78 described as a cytoplasmic protein, however two studies have observed that low  
79 levels of IFI44 can be found in the nucleus (12, 13). Hallen *et al.* reported that  
80 overexpression of IFI44 was able to reduce proliferation of two melanoma cell lines  
81 independently of IFN-I (13). The anti-proliferative mechanism of IFI44 remains  
82 unexplored.

83 Even less is known about the tropism and function of IFI44L. IFI44L has been shown  
84 to have a moderate impact on Hepatitis C virus infection (14). Interestingly, *IFI44L*  
85 expression has also been associated with several autoimmune disorders (15-17),  
86 cancer (18, 19), and humoral responses to vaccination (20). These seemingly  
87 disparate contexts suggest that *IFI44L* may be a biomarker of IFN responses  
88 independent of the type of stimulus. Interestingly, IFI44L expression is sufficient to  
89 distinguish viral from bacterial infection (21). Like IFI44, IFI44L has antiproliferative  
90 activity, associated with increased activation of Met/Src signalling (18).

91 Using both overexpressing and knockout cell lines, we demonstrated that IFI44 and  
92 IFI44L are antiproliferative factors that can independently restrict RSV infection. We  
93 report that this ability to restrict infection involves the reduction of viral genome  
94 transcription or replication but was not dependent upon a predicted guanosine-5'-  
95 triphosphate (GTP)-binding region present in either protein. We demonstrate for the  
96 first time that the loss of IFI44 expression in a mouse model of infection is associated  
97 with more severe RSV disease.

## 98 **Methods**

99 **Clinical cohort.** *IFI44* and *IFI44L* expression was analysed in a published clinical  
100 cohort of febrile infants with either moderate or severe RSV infection [13]. The  
101 microarray gene expression dataset (GSE72810) was retrieved from the National  
102 Institutes of Health Gene Expression Omnibus database (22) using the GEOquery  
103 package (23) in R (24). Normalisation was performed using robust spline  
104 normalisation (RSN) from the lumi package (25) followed by a log transformation.  
105 Patients with suspected or confirmed bacterial infection were removed (n = 4).  
106 Cohort demographics are described in the associated figures. Prior to differential  
107 expression probes were removed if the expression was not above 6 in at least 4  
108 samples. Differential expression was performed using Limma and expression values  
109 were normalised using robust spline normalisation and a log transformation, plotted  
110 p-values are not adjusted for multiple testing (values in tables are Benjamini-  
111 Hochberg corrected). Interferon stimulated genes were downloaded from KEGG.

112 **Cell culture and viruses.** HEp-2 (from P. Openshaw, Imperial College London),  
113 A549 (ATCC CCL-185), and HEK293T/17 (ATCC CRL-11268) cells were maintained  
114 in Dulbecco's modified eagle medium supplemented with 10% v/v foetal calf serum,  
115 1% v/v penicillin/streptomycin, and 1% v/v L-glutamine. RSV strain A2 (from P.  
116 Openshaw, Imperial College London) and rgRSV (26) were passaged in HEp-2 cells  
117 before quantification of viral titre by plaque assay. VSV-G pseudotyped Lentiviral  
118 particles were produced by triple transfection in HEK293T/17 cells using  
119 Lipofectamine 3000 (Thermofisher). Lentiviral vectors pTRIP-FLUC-tagRFP, pTRIP-  
120 IFI44-tagRFP, and pTRIP-IFI44L-tagRFP were a kind gift from M. Dorner (Imperial  
121 College London). To generate mutant proteins these vectors were altered by using  
122 QuickChange® XL site-directed mutagenesis (Agilent Technologies) according to the

123 manufacturer's instruction. Lentivirus was harvested 24-52 hours after transfection  
124 and concentration of transducing units (TU) determined by flow cytometry. For  
125 transduction,  $5 \times 10^4$  cells were seeded into each well of a 24-well plate. After 24  
126 hours cells were transduced with  $2 \times 10^5$  TU ml<sup>-1</sup> lentivirus containing supernatant.  
127 Stably transduced clonal populations were recovered following fluorescence-  
128 activated cell sorting (FACS). RFP expression was monitored over three weeks and  
129 expression of IFI44 or IFI44L confirmed by quantitative PCR (qPCR) or Western  
130 blotting.

131 **Quantitative PCR.** For analysis of *in vitro* samples, cells were lysed in RLT buffer  
132 and RNA extracted using Qiagen RNeasy kit according to the manufacturer's  
133 instructions (Qiagen). RSV viral load *in vivo* was assessed by extracting RNA from  
134 frozen lung tissue using Trizol extraction after disruption in a TissueLyzer (Qiagen).  
135 Complementary DNA (cDNA) was reverse transcribed from RNA extracts using  
136 GoScript reverse transcriptase with random primers according to the manufacturer's  
137 instructions (Promega). qPCR reactions were carried out on a Stratagene Mx3005p  
138 thermal cycler (Agilent Technologies). RSV viral load was quantified by amplification  
139 of the RSV L gene using 900 nM forward primer (5'-  
140 GAACTCAGTGTAGGTAGAATGTTTGCA-3'), 300 nM reverse primer (5'-  
141 TTCAGCTATCATTCTCTGCCAAT-3'), and 100 nM probe (5'-FAM-  
142 TTTGAACCTGTCTGAACAT-TAMRA-3') in Taqman™ Universal master mix, no  
143 AmpErase™ UNG (Thermofisher). Absolute copy number was calculated by  
144 comparison to a plasmid standard. mRNA was amplified with SYBRselect master  
145 mix (Thermofisher) according to the manufacturer's instructions. The following  
146 primers were used at a final concentration of 250 nM: hIFI44 (forward 5'-  
147 TGGTACATGTGGCTTTGCTC-3', reverse 5'-CCACCGAGATGTCAGAAAGAG-3'),

148 hIFI44L (forward 5'-AAGTGGATGATTGCAGTGAG-3', reverse 5'-  
149 CTCAATTGCACCAGTTTCCT-3'), hGAPDH (forward 5'-  
150 GGACCTGACCTGCCGTCTAG-3', reverse 5'-TAGCCCAGGATGCCCTTGAG-3'),  
151 *mIfi44* (forward 5'-AACTGACTGCTCGCAATAATGT-3', reverse 5'-  
152 GTAACACAGCAATGCCTCTTGT-3'), *mIfi44l* (forward 5'-  
153 AGTGACAGCCAGATTGACATG-3', reverse 5'-CATTGTGGATCCCTGAAGAGAA-  
154 3'), and *mGapdh* (forward 5'-AGGTCGGTGTGAACGGATTTG-3', reverse 5'-  
155 TGTAGACCATGTAGTTGAGGTCA-3'). Fold-change in target gene in treated  
156 samples was calculated using the  $\Delta\Delta C_t$  method (Ct = cycle threshold) and  
157 normalised to a reference transcript (27).

158 **Western blotting.** Cells were lysed using RIPA buffer (Sigma) containing 1 x  
159 cComplete™ Ultra protease inhibitor cocktail (Sigma). Proteins were separated by  
160 SDS-PAGE using 4-20% pre-cast Mini-Protean TGX gels (Bio-rad) before transfer  
161 onto a nitrocellulose membrane using the Trans-Blot turbo transfer system (Bio-rad).  
162 Membranes were blocked for 1 hour at room temperature (RT) with 5% milk in PBS  
163 with 0.1% Tween 20. Membranes were probed using the following primary  
164 antibodies for 16 hours at 4°C: IFI44 (ThermoFisher, PA5-65370) and IFI44L (VWR,  
165 ARP46166),  $\beta$ -actin (Abcam, ab8227). Membranes were washed and probed with  
166 anti-IgG HRP-conjugated antibodies (Dako) prior to chemiluminescent detection.

167 **Flow cytometry.** Analysis was performed on a Becton Dickinson Fortessa LSR  
168 using a 561 nm laser and 582/15 band pass filter to detect tag-RFP positive cells, a  
169 499 nm laser and 530/30 band pass filter to detect GFP positive cells. Acquisition  
170 was set to record  $10^4$  events followed by doublet gating and analysis with FlowJo  
171 V10.

172 **RSV Plaque assay.** RSV titre in cell-free supernatant was quantified by  
173 immunoplaque assay using biotinylated goat anti-RSV polyclonal antibody (Abcam).  
174 HEp-2 cells were infected with dilutions of RSV-containing supernatant for 24 hours.  
175 Cells were fixed in methanol containing 2% hydrogen peroxide for 20 minutes at RT.  
176 Cells were washed with 1% bovine serum albumin (BSA) PBS prior to addition of  
177 anti-RSV antibody for 1 hour. Plaques were then visualised by incubating the cells  
178 with ExtrAvidin peroxidase followed by 3 amino-ethylcarbazole substrate (Sigma).

179 **CRISPR knockout generation.** Guide RNA (gRNA) sequences targeting human  
180 *IFI44* (gRNA1: CAA TAC GAA TTC T; gRNA2: GAA AGA AGG CGG CCT GTG C)  
181 and *IFI44L* (gRNA1: TAA CCT AGA CGA CAT AAA G; gRNA2: GTG ACT GGC CAA  
182 GCC GTA G) were synthesised according to Sanjana et al (28) and cloned into  
183 pSpCas9(BB)-2A-GFP (Addgene, #48138) following *BbsI* digestion. Insertion of  
184 gRNA sequences validated by sequencing (Eurofins Genomics). A549 cells were  
185 transfected and sorted by FACS after 48 hours. Clonal knockouts were validated by  
186 PCR amplification of the targeted region, agarose gel electrophoresis, Western  
187 blotting, and sequencing. Clustal Omega was used for multiple sequence alignment  
188 (29).

189 **Proliferation assays.** Viable cell numbers were quantified either by Trypan blue  
190 exclusion or by the production of formazan product ( $OD^{490}$ ) 2 hours after addition of  
191 CellTiter 96<sup>®</sup> Aqueous One Solution assay reagent (Promega) according to the  
192 manufacturer's instructions. Different cell lines were seeded at equal densities and  
193 viable cell number quantified 6-48 hours later. Cell division was assessed by staining  
194 cells with 5  $\mu$ M CellTrace Violet reagent (Thermofisher) and flow cytometric analysis  
195 ( $10^4$  single cell events, 405 nm laser with a 450/50 band pass filter) after 72 hours.



196 Prior to analysis cells were harvested and fixed for 20 minutes at RT in 4%  
197 paraformaldehyde.

198 **RSV cold-bind assay.** Stably transduced cell lines were seeded at equal densities  
199 24 hours prior to infection. Each cell line was counted prior to infection to ensure  
200 inoculums were normalised across different cell lines. Cells were equilibrated to 4°C  
201 for 30 minutes before media was removed and infected with RSV A2 in a minimal  
202 volume of serum-free DMEM for 90 minutes at 4°C. Cells were then washed 3 x with  
203 ice-cold 1x PBS and lysed in RLT buffer (Qiagen) with 1/100 β-mercaptoethanol  
204 (Sigma) for quantification of RSV L gene RNA.

205 **RSV minigenome assay.** The RSV Minigenome and plasmids expressing RSV L,  
206 N, P, and M2-1 proteins were described previously (30). pGEM3-Gaussia/Firefly  
207 encodes a sub-genomic RSV replicon. From the 3' end: A2 leader sequence (Le),  
208 Gaussia luciferase open-reading frame (ORF) with an NS1 gene start (GS) and M  
209 gene end (GE) sequence, Firefly luciferase ORF with SH GS and GE sequences, A2  
210 trailer region (Tr). HEK293T/17 cells and stably transduced 293T/17 cell lines were  
211 seeded 24 hours prior to transfection at 90% confluency in 24-well plates. The cells  
212 were transfected using Lipofectamine 3000 with a DNA mixture of 0.25 µg pGEM3-  
213 Gaussia/Firefly minigenome, 0.125 µg pCITE-L, 0.25 µg pCITE-P, 0.06 µg pCITE-  
214 M2-1, 0.25 µg pCITE-N, 0.12 µg pSV-β-Gal (Promega), and 0.25 µg pCAGGS-T7  
215 (Addgene #65974). Negative controls were transfected with the DNA mix with  
216 pCITE-L replaced by pcDNA3.1. Cells were lysed in 1 x passive lysis buffer  
217 (Promega) after 24 hours. Firefly luciferase activities were measured in 10 µl of  
218 lysate using 50 µl luciferase assay substrate (Promega). To normalise transfection  
219 efficiencies β-Galactosidase levels were measured using the β-Galactosidase  
220 Enzyme Assay System (Promega). 20 µl of lysate was diluted 1:1 in 1x reporter lysis

221 buffer before addition of 40  $\mu$ l 2x assay buffer. Following incubation at 37°C for 1  
222 hour 150  $\mu$ l 1 M Na<sub>2</sub>CO<sub>3</sub> was added and absorbance measured at 420 nm.

223 **Mouse infection.** Background-, sex-, and age-matched, >95% C57BL/6N or  
224 BALB/c, wild type and *Ifi44*<sup>tm1b(komp)Wtsi</sup> (*Ifi44*<sup>-/-</sup>) mice (31) (Wellcome Trust Sanger  
225 Institute) were supplied with food and water *ad libitum* and monitored daily. Mice  
226 were infected intranasally (i.n.) with 1-4 x 10<sup>5</sup> plaque-forming units (PFU) of RSV A2  
227 in 100  $\mu$ L under isoflurane anaesthesia.

228 **Enzyme-linked immunosorbent assay.** Bronchoalveolar lavage fluid (BALF) was  
229 collected by inflating the lungs with PBS. Supernatant was collected after  
230 centrifugation and assayed. For lung homogenate, lung tissue was homogenised  
231 through a 100  $\mu$ m cell strainer (Falcon) and supernatant collected after centrifugation  
232 and ACK lysis. Cytokines in lung homogenate and BALF were quantified using  
233 DuoSet ELISAs according to the manufacturer's instructions (R&D systems).

234 **Luminex<sup>®</sup> multiplex ELISA.** Lung homogenate supernatant was subjected to a  
235 magnetic Luminex<sup>®</sup> assay using a premixed multi-analyte kit: CXCL10, CCL3,  
236 CXCL2, CXCL1, IL-5, CCL2, IL-1 $\alpha$ , and CCL5 (R&D systems). Samples and diluted  
237 microparticles were combined according to the manufacturer's instructions and  
238 incubated for 2 hours at RT (800 rpm). A magnet was applied to the bottom of the  
239 plate and wells were washed x 3 for 1 minute each, before addition of a Biotin  
240 Antibody cocktail (1h RT, 800 rpm). The previous wash was repeated, and  
241 Streptavidin-PE added to each well (30m RT, 800 rpm). The wash was repeated and  
242 microparticles resuspended in wash buffer for analysis on a Bio-Plex<sup>®</sup>100 Luminex  
243 machine (Bio-rad).

244 **Statistical analysis.** Analysis performed in Prism 8 as described in figure legends  
245 (GraphPad Software).

246 **Ethics.** All animal experiments were maintained in accordance with UK Home Office  
247 regulations, the UK Animals (Scientific Procedures) Act 1986 and reviewed by an  
248 Animal Welfare and Ethical Review Body. The work was done under PPL  
249 P4EE85DED. Clinical data presented was collected in a previous study [13]. Written  
250 informed consent was obtained from parents or guardians using locally approved  
251 research ethics committee permissions (St Mary's Research Ethics Committee (REC  
252 09/H0712/58 and EC3263); Ethical Committee of Clinical Investigation of Galicia  
253 (CEIC ref 2010/015); UCSD Human Research Protection Program No. 140220; and  
254 Academic Medical Centre, University of Amsterdam (NL41846.018.12 and  
255 NL34230.018.10).

## 256 **Results**

### 257 **IFI44 and IFI44L expression in human infants with severe RSV infection**

258 We have previously identified a number of ISGs that are consistently upregulated in  
259 response to RSV (8), of which IFI44 and IFI44L featured prominently. We focussed  
260 on these two genes as relatively little was known of their phenotype. Our hypothesis  
261 was that at an individual gene level, there should be a significant difference in gene  
262 expression RSV infected children with severe disease. To test this, we examined  
263 gene expression levels of both *IFI44* and *IFI44L* in data previously generated by  
264 microarray on RNA extracted from whole blood derived PBMCs, collected from  
265 children with confirmed RSV infection. We compared those who required paediatric  
266 intensive care unit (PICU) admission with those who were admitted to a general  
267 hospital ward (General). When investigated as individual genes in the dataset, the  
268 expression of both IFI44 ( $P = 0.0082$ , Fig. 1b) and IFI44L ( $P = 0.0248$ , Fig. 1c) was  
269 significantly lower in those patients admitted to the paediatric intensive care unit  
270 (PICU). IFI44 expression correlated with IFI44L expression across both moderate  
271 and severe RSV patients ( $p < 0.001$ ,  $r^2 = 0.74$ , Fig. 1d). It should be noted that, when  
272 investigated in the context of global gene expression data, the differences between  
273 general hospital and intensive care admission were not significant, though IFI44L did  
274 have a greater than 2log fold change (Fig. 1e). This observed difference supported  
275 the rationale for looking at the function of IFI44 and IFI44L in more detail.

### 276 ***IFI44* and *IFI44L* are upregulated early in response to IFN-I and RSV**

277 Human lung epithelial A549 cells treated with recombinant IFN $\alpha$ 2a robustly  
278 upregulated expression of *IFI44* and *IFI44L* mRNA within 2 and 6 hours respectively  
279 ( $P < 0.01$ , Fig. 2a). Induction following RSV infection was slower than IFN, with *IFI44*

280 and *IFI44L* upregulated within 6 and 12 hours ( $P < 0.05$ , Fig. 2b). Expression  
281 remained upregulated for at least 48 hours following treatment or infection. IFI44  
282 protein was increased following 24-48 hours of IFN $\alpha$ 2a stimulation (Fig. 2c) and  
283 undetectable in unstimulated cells. IFI44L protein was detectable in unstimulated  
284 cells, it did not appear to be induced by IFN treatment relative to the control  
285 untreated cells (Fig. 2c). After recombinant IFN treatment expression of both genes  
286 plateaued after 6 hours but expression continued to increase during the first 48  
287 hours of RSV infection, in parallel with viral RNA levels (Fig. 2d). When cells were  
288 pre-treated with IFN $\alpha$ 2a before infection, there was a significant reduction in viral  
289 RNA levels (Fig. 2e)

290 Similarly, the expression of both *Ifi44* and *Ifi44l* RNA was significantly upregulated  
291 rapidly after intranasal infection of BALB/c mice, detectable from 6 hours ( $P < 0.05$ ,  
292 Fig. 2f). Gene expression peaked after 24 hours and returned towards baseline  
293 levels by day 14 in parallel with levels of viral RNA that also reduced as the infection  
294 was cleared (Fig. 2g).

### 295 **Overexpression of IFI44 or IFI44L restricts RSV infection**

296 In a previous screen to identify ISGs that impact RSV infection McDonald *et al.*  
297 showed that transient overexpression of human IFI44 or IFI44L by lentiviral  
298 transduction reduced the percentage of RSV infected cells (8). Here, we generated  
299 stably transduced clonal cell lines by lentiviral transduction, followed by  
300 fluorescence-activated cell sorting (FACS) selection. Following expansion, clonal  
301 populations were selected that expressed TagRFP after three weeks in culture  
302 following sorting. Individual cell lines were then selected based on detectable  
303 expression of either *IFI44* or *IFI44L* by qPCR (Fig. 3a). *MX1* expression was

304 assessed in each stable cell line to confirm the specificity of overexpression to either  
305 *IFI44* or *IFI44L*. There were no significant differences in expression of *MX1* in either  
306 cell line following IFN-I stimulation suggesting that neither *IFI44* or *IFI44L* are  
307 regulators of the IFN response.

308 To monitor the impact on infection, cells were infected with m.o.i. 0.1 or 0.01  
309 recombinant GFP-expressing RSV (rgRSV), and the percentage of RFP<sup>+</sup> single cells  
310 that were GFP<sup>+</sup> was quantified after 24 hours. After 24 hours of rgRSV infection, cell  
311 lines expressing either *IFI44* or *IFI44L* showed a significant reduction in the  
312 percentage of infected cells relative to cells stably transduced with empty vector ( $P <$   
313  $0.05$ , Fig. 3c). To confirm the impact on RSV infection we examined the impact on  
314 wild-type RSV A2 infection in these stable cell lines. We observed a significant  
315 reduction in viral RNA 24 hours after infection (m.o.i. 0.01) ( $P < 0.05$ , Fig. 3d). To  
316 observe impact on virus progeny production, we measured the viral titre 48 hours  
317 after infection. The recoverable titre of RSV A2 virus was significantly reduced in  
318 cells expressing either *IFI44* or *IFI44L* ( $P < 0.05$ , Fig. 3e).

319 In order to demonstrate that the impact of *IFI44* expression is not a result of clonal  
320 differences, we transduced polyclonal A549 cells with lentivirus expressing either  
321 Firefly luciferase (FLUC) or *IFI44* and subsequently infected the cells with rgRSV  
322 after 24 hours. Expression of *IFI44* protein was confirmed (Fig. 3f) and significant  
323 restriction in rgRSV infection ( $P < 0.05$ , Fig. 3g) was observed similar to that seen in  
324 the stably transduced cell line. Overall these data suggest that both *IFI44* and *IFI44L*  
325 are able to restrict RSV infection.

326 **Knockout of *IFI44* results in elevated RSV infection *in vitro***

327 To further examine the role of IFI44 or IFI44L on RSV infection we used a pool of  
328 endoribonuclease-prepared siRNA (esiRNA) targeting *IFI44* to knockdown  
329 expression. These esiRNAs reduced levels of *IFI44* mRNA by only 48% ( $P < 0.01$ )  
330 and also reduced *IFI44L* mRNA levels by 30%, although this was not statistically  
331 significant (Fig. 4a). However, esiRNA knockdown was sufficient to cause an over 2-  
332 fold increase in the levels of viral RNA in esiRNA-IFI44 transfected A549 cells  
333 infected with RSV A2 (m.o.i. 0.1) relative to cells transfected with a non-targeting  
334 control ( $P < 0.01$ , Fig. 4b).

335 Due to the low efficiency of the knockdown and potential unintended impact of siRNA  
336 on *IFI44L* expression we developed CRISPR-Cas9 edited IFI44 and IFI44L deficient  
337 cell lines, this also enabled us to investigate the impact of double knockouts. A549  
338 cells were transfected with two guide RNA (gRNA) constructs encoded *in cis* with the  
339 *Streptococcus pyogenes* Cas9 enzyme and a GFP marker. gRNA sequences  
340 targeting regions in exons 4 and 5 of *IFI44* and exons 3 and 4 of *IFI44L* were used.  
341 Following transfection, the top 2% GFP<sup>+</sup> cells were sorted as single cells. Gene  
342 editing was confirmed in clonal populations through PCR of the targeted region (data  
343 not shown) and loss of either IFI44 or IFI44L protein expression after treating with  
344 IFN $\alpha$  (Fig. 4c). Five IFI44 deficient ( $\Delta$ IFI44), two IFI44L deficient ( $\Delta$ IFI44L), and three  
345 clonal populations deficient in both IFI44 and IFI44L ( $\Delta$ IFI44 $\Delta$ IFI44L) were isolated.  
346 Selection of clones was based on sequencing. The  $\Delta$ IFI44 clone selected for further  
347 study had mutations resulting in a frameshift and stop codon formation in each  
348 detectable allele. The  $\Delta$ IFI44L clone selected had a large deletion in one allele and  
349 disruption of an exon-intron boundary.

350 The selected clones were treated with 500 IU ml<sup>-1</sup> IFN $\alpha$ 2 $\alpha$  and subsequently infected  
351 with RSV A2 for 24 hours (Fig. 4d). There were significantly increased levels of viral

352 RNA in the  $\Delta$ IFI44 clone at m.o.i. 0.1 ( $P < 0.01$ ), although we noted a non-significant  
353 increase in infection in the  $\Delta$ IFI44 $\Delta$ IFI44L cells ( $P = 0.079$ ). The loss of IFI44L  
354 expression was only associated with a significant increase in viral RNA at m.o.i. 0.01  
355 ( $P < 0.01$ ). Clones were infected with RSV A2 (m.o.i. 0.1) for 48 hours and viral titre  
356 assessed in the culture medium, there was with a >2-fold increase in viral titre (Fig.  
357 4e) in each clone. Knockout of both *IFI44* and *IFI44L* resulted in a 4-fold increase in  
358 viral titre (Fig. 4e,  $P < 0.05$ ).

### 359 **IFI44 and IFI44L reduce cellular proliferation**

360 Previous studies have described an effect of IFI44 or IFI44L on cell proliferation (13,  
361 18). We investigated the impact of these factors on proliferation by assaying growth  
362 of selected knockout clones. Knocking out either or both genes was associated with  
363 increased proliferation, using a colorimetric assay measuring cellular metabolic  
364 activity ( $P < 0.05$ , Fig. 5a). When viable cell numbers were quantified manually by  
365 Trypan blue exclusion only the *IFI44* KO was associated with a significant increase  
366 in cell number ( $P < 0.05$ , Fig. 5b). Overexpression of either gene led to a significant  
367 reduction in proliferation after 24 hours quantified by either method ( $P < 0.05$ , Fig.  
368 5c-d). Cells perfused with CellTrace Violet dye were allowed to proliferate for 72  
369 hours prior to analysis by flow cytometry to assess cell division. We noted that both  
370 IFI44 and IFI44L stably transduced cell lines had an increased mean fluorescence  
371 intensity ( $P < 0.05$ , Fig. 5f) suggesting reduced dye dilution and a reduced rate of cell  
372 division. The overexpression of IFI44 or IFI44L was not associated with any increase  
373 in cytotoxicity, further suggesting that the observed reduction in viable cell number  
374 and proliferation is not a result of increased cell death (Fig. 5g).

### 375 **IFI44 reduces RSV polymerase activity**



376 To investigate where in the viral life cycle IFI44 and IFI44L have an impact we  
377 analysed infection at an acute time point (8h) where viral positive cells should only  
378 be newly infected cells and not the result of cell-cell virus spread. IFI44 or IFI44L  
379 expression reduced the percentage of infected cells by 44% ( $P < 0.01$ ) and 34%  
380 ( $P = 0.11$ ) respectively (Fig. 6a-b) relative to vector control cells, suggesting both  
381 proteins are impacting a stage of the viral life cycle prior to new virion release. Using  
382 a cold-bind infection assay (RSV A2, m.o.i. 2), where the virus is able to bind the cell  
383 surface but is not internalised, we saw no significant difference in levels of viral RNA  
384 between cell lines expressing either FLUC (Vector), IFI44, or IFI44L (Fig. 6c). To  
385 bypass cell entry and to assess whether IFI44 or IFI44L restrict RSV genome  
386 replication or transcription we transfected stably transduced clonal 293T cells with an  
387 RSV minigenome system. IFI44 expression reduced minigenome activity by 44%  
388 ( $P < 0.05$ ), suggesting reduced RSV polymerase activity (Fig. 6d). The stably  
389 transduced 293T line expressing IFI44L also reduced minigenome activity by 45%  
390 although this was not statistically significant ( $P = 0.085$ ).

### 391 **A predicted GDP/GTP-binding site in IFI44 is dispensable for antiviral activity**

392 IFI44 and IFI44L both contain predicted GTPase regions. Five motifs, G1-G5, are  
393 involved in GTP hydrolysis and the required nucleotide and cofactor interactions  
394 (32). Both proteins contain a putative G1 region (GXXXXGKS), initially identified in  
395 IFI44 by Hallen *et al* (13), that is predicted to bind the  $\beta$ -phosphate of GDP or GTP  
396 (32). The terminal serine residue also contributes to  $Mg^{2+}$  binding. The G1-G4  
397 regions of human IFI44 and IFI44L were recently annotated by McDowell *et al* (Fig.  
398 6e) (33). The G3 DxxG motif in IFI44 and IFI44L is immediately followed by a  
399 hydrophobic leucine residue found in other dynamin-like GTPases such as GBP1,  
400 instead of a catalytic glutamine residue seen in ras-like GTPases. IFI44L also

401 contains a G4 motif which mediates binding to the guanine base of GDP or GTP.  
402 However, IFI44 does not contain a complete G4 motif. G5 residues are not easily  
403 recognised as they are not as well conserved as G1-4 motifs.

404 A549 WT cells were transduced with a lentivirus expressing FLUC (Vector), IFI44  
405 WT, or IFI44 $\Delta_{193-201}$  with the G1 region deleted. Mutation of this region in another  
406 IFN-inducible GTPase, GBP1, has been shown to reduce nucleotide binding around  
407 up to 50-fold, having a greater impact than mutation of G2-G4 regions (34). A  
408 comparable reduction in rgRSV infectivity was seen in cells transduced with either  
409 IFI44 $\Delta_{193-201}$  or IF44 WT (Fig. 6f), suggesting this region is not required for its antiviral  
410 function.

#### 411 **Disease severity is altered in an *Ifi44*<sup>-/-</sup>/*Ifi44L*<sup>-/-</sup> mouse model of RSV infection**

412 Having demonstrated that IFI44 and IFI44L were able to impact RSV infection *in vitro*  
413 we then investigated the effect of the absence of *Ifi44* and *Ifi44L* in an *in vivo* mouse  
414 model of RSV infection. The wild-type C57BL/6N used in this study are *Ifi44L*<sup>-/-</sup>,  
415 presumably as a result of gene loss over colony in-breeding, so the comparison was  
416 between IFI44<sup>-/-</sup>/*Ifi44L*<sup>-/-</sup> and IFI44<sup>+/+</sup>/*Ifi44L*<sup>-/-</sup> (WT). Age-matched *Ifi44*<sup>-/-</sup> and WT  
417 mice were infected intranasally with 10<sup>5</sup> PFU RSV A2 and monitored for weight  
418 change over a 7-day infection. Animals were sacrificed at day 4 and 7 after infection.  
419 There was greater weight loss in *Ifi44*<sup>-/-</sup> mice than wild-type controls from days 5-7  
420 after infection (P < 0.01, Fig. 7a). There was no difference in total cell numbers  
421 isolated from the bronchoalveolar lavage fluid or from whole lung tissue (Fig. 7b-c).  
422 Levels of viral RNA in lung tissue was also significantly higher in *Ifi44*<sup>-/-</sup> mice at day 4  
423 (P < 0.01) but not at day 7 (Fig. 7d).

424 Levels of inflammatory cytokines and immunomodulatory factors were analysed  
425 either by ELISA or Luminex. Here we noted that most measured analytes (IL-6,  
426 CCL3, CXCL2, CXCL1, CCL2, IL-5, IL-1 $\alpha$ , and CCL5) were not significantly different  
427 between the WT and *Ifi44*<sup>-/-</sup> groups (Fig. 7e-f). CXCL10 (P < 0.05, Fig. 7f) and IL-1 $\beta$   
428 (P < 0.05, Fig. 7e) were both significantly but modestly reduced in the KO animals on  
429 day 4 after infection. There was no difference in any measured cytokine on day 7  
430 after infection (Fig. 7g) To determine whether the lack of IFI44 modulated IFN  
431 responses to RSV infection both *Ifn*- $\beta$  and *Ifn*- $\gamma$  expression was assessed by qPCR.  
432 Both wild-type and *Ifi44*<sup>-/-</sup> groups demonstrated similar levels of *Ifn*- $\beta$  (Fig. 7h) and  
433 *Ifn*- $\gamma$  (Fig. 7i) mRNA.

## 434 **Discussion**

435 The data presented here explore how the ISGs IFI44 and IFI44L modulate viral  
436 infection. We demonstrate that IFI44 and IFI44L restrict RSV infection and reduce  
437 RSV genome replication or transcription. We also show, for the first time, that RSV  
438 infection is enhanced in an *Ifi44*<sup>-/-</sup>/*Ifi44L*<sup>-/-</sup> knockout mouse model. Infectivity was  
439 reduced by IFI44 expression at just 8 hours after infection, suggesting restriction of  
440 infection occurs before the exit of new virions. Virus attachment was unaffected by  
441 either IFI44 or IFI44L expression, this was expected as these proteins are both  
442 predicted to be internally expressed (12, 13). Using an RSV minigenome assay, we  
443 found that IFI44 expression significantly reduced RSV polymerase activity. However,  
444 we cannot say whether this is an impact specifically on the replication or transcription  
445 of the viral genome. We also observed that both IFI44 proteins decreased the rate of  
446 cellular proliferation. Reduced proliferation is a common feature of the IFN response,  
447 mediated by canonical ISGs such as protein kinase R (PKR) (35) and the IFN-  
448 induced tetratricopeptide repeat (IFIT) family (36). Whether the anti-proliferative  
449 function of the IFI44 proteins is a causative mechanism of their antiviral activity is not  
450 clear, because cell cycle arrest may increase the availability of cellular machinery  
451 required for replication and virus assembly (37). For example, the RSV matrix protein  
452 (M) has previously been shown to induce cell cycle arrest by inducing p53/p21  
453 expression in alveolar epithelial cells, enhancing infection (38, 39). The two genes  
454 have a high degree of homology and whether they have distinct mechanisms or are  
455 redundant is unclear at this time.

456 Our *in vitro* studies have some limitations, primarily the use of clonal cell lines to  
457 assay infection and proliferation. We note that transduction of polyclonal parental  
458 A549 cells with IFI44 is capable of restricting RSV infection similarly to the stably

459 transduced cells, and that previous studies have observed similar impacts of IFI44  
460 on proliferation (13, 18) or restriction of RSV (8). However, it is possible that clone-  
461 specific differences have some impact on either RSV infection or cell viability and  
462 these data should be interpreted with this limitation in mind. In the knockout cell line,  
463 there was a slight difference in the effect on viral RNA and infectious virus  
464 recovered, this may reflect differences in the two assays or a difference in where the  
465 ISG affect replication or packaging.

466 This is the first study to describe viral infection in *Ifi44*<sup>-/-</sup>/*Ifi44L*<sup>-/-</sup> mice. *Ifi44*<sup>-/-</sup>/*Ifi44L*<sup>-/-</sup>  
467 mice were markedly more susceptible to RSV infection than WT mice, exhibiting  
468 increased weight loss and elevated viral load. The genome sequence of C57BL/6N  
469 mice reveals a deletion in *Ifi44l* predicted to ablate expression. We were unable to  
470 detect transcription of this gene in these mice during RSV infection whereas this was  
471 readily detectable in the lungs of RSV-infected BALB/c mice. We observed that *Ifi44*  
472 <sup>-/-</sup>/*Ifi44L*<sup>-/-</sup> mice infected with RSV had higher levels of viral RNA present in their lungs  
473 at the peak of infection, along with decreased expression of the pro-inflammatory  
474 factor IL-1 $\beta$ . A previous study has noted that in adult mice, blockade of IL-1 $\beta$  prior to  
475 RSV infection, results in elevated viral load (40). Decreased production of this key  
476 cytokine along with increased viral replication, due to changes in cellular proliferation  
477 and metabolism driven by the loss of IFI44, may go some way to explaining these  
478 observations. We saw no change in TNF, but this reflects our recent findings that  
479 TNF is only associated with early weight loss after RSV infection, but not later time  
480 points (41).

481 Our data showing an antiviral role for IFI44 and IFI44L matches our previous study  
482 using a lentivirus screen (8) and a broader screen by another group using the same  
483 lentivirus panel (14). However, the data presented here is somewhat at odds with

484 recently published studies investigating the impact of IFI44 (42) and IFI44L (43) on  
485 virus in vitro. In the published studies reducing IFI44 or IFI44L in vitro using siRNA  
486 led to increased viral recovery, which was hypothesized to be linked to decreased  
487 ISG expression. We did not see an effect of IFI44 or IFI44L over-expression on the  
488 expression of the ISG Mx1. One possible difference between study designs is the  
489 role of cell proliferation. We observed that IFI44 and IFI44L had a significant anti-  
490 proliferative effect and to normalise we counted cell numbers in parallel wells prior to  
491 infections and altered the viral inoculum to ensure equivalent MOI were used. The  
492 parallels between the in vivo and in vitro phenotype give us confidence that the  
493 genes can have an antiviral function.

494 One question of interest is about the redundancy of ISGs in the control of infection.  
495 Using knockout mouse models, an increase in RSV disease severity has been seen  
496 for a variety of antiviral ISGs such as Ifitm3 (44), Ifitm1 (5), and Irf7 (8). It is curious  
497 that in these *in vitro* and *in vivo* models, single gene loss can result in the loss of viral  
498 control, when the host network of ISGs consists of potentially over 1000 genes.  
499 Whilst some associations between individual ISGs and disease severity have been  
500 observed in humans – for example IFITM3 (45, 46), more often primary  
501 immunodeficiencies caused by mutations in the interferon sensing and signalling  
502 pathways such as STAT1 and TLR3 display incomplete penetrance and only specific  
503 susceptibilities (47). Potentially the use of large volumes relative to lung size and  
504 high doses of virus to ensure infection in the mouse model stresses the system and  
505 therefore the role of individual genes becomes more apparent. It was of note that we  
506 observed a significant reduction in IFI44 and IFI44L expression associated with  
507 infant patients requiring PICU admission, when tested in isolation, but in the global  
508 comparison, there were other genes that were more significantly different,

509 suggesting there may be a more coordinated effect that influences disease severity.  
510 It should also be noted that the children requiring intensive care were significantly  
511 younger, which may impact gene expression. This may be the result of reduced IFN  
512 activity as a whole – this has been seen in another cohort of children with RSV  
513 infection (48) where those children with severe infection had lower global expression  
514 of ISG. This suggests that ISGs work in concert to control infection, targeting  
515 different aspects of the viral life cycle, with some factors such as IFITM1 controlling  
516 entry (5) and others restricting replication within the cell. Further work is required to  
517 understand whether lower expression levels during human infection predispose to  
518 severe RSV and might explain some of the heterogeneity in disease severity in  
519 children. Several expression quantitative trait loci (eQTL) are described for these  
520 genes (49), including one located within the *IFI44L* gene, rs273259, that was the top-  
521 hit in a genome-wide association study of adverse responses to a live virus vaccine  
522 (MMR) (50). Cells with the rs273259 risk allele expressed *IFI44* at lower levels, and  
523 *IFI44L* with altered splice isoform levels (50). These findings establish a precedent  
524 for polymorphisms affecting *IFI44* and *IFI44L* expression to influence predisposition  
525 to a severe response to viral infection.

526 Our study demonstrates that *IFI44* and *IFI44L* play a role in the control of RSV  
527 infection. They work intracellularly, reducing the ability of the virus to replicate. Since  
528 the proteins are anti-proliferative, this may be part of the mechanism. Understanding  
529 how they reduce viral replication may provide future avenues for therapeutic  
530 interventions.

531 **Acknowledgements**

532 Marcus Dorner and Jessie Skelton for providing lentiviral constructs for gene  
533 expression. DCB studentship was funded by The Wellcome Trust (109056/Z/15/A).

534 **Contributions**

535 DCB: Conceptualization, Investigation, Methodology, Writing – original draft; DH-C:  
536 Formal analysis; SC: Resources, Investigation; CB: Investigation; IB: Resources;  
537 MK: Formal analysis, Supervision; JH: Resources; ML: Supervision, Funding  
538 Acquisition; JFE: Resources; PK: Supervision, Writing- Review and editing; JST:  
539 Conceptualization, Funding Acquisition, Writing – original draft.

540 **Declaration of Interests**

541 The authors declare no competing interests.

542 **References**

- 543 1. Tregoning JS, Schwarze J. 2010. Respiratory viral infections in infants: causes, clinical  
544 symptoms, virology, and immunology. *Clin Microbiol Rev* 23:74-98.
- 545 2. Garcia CG, Bhore R, Soriano-Fallas A, Trost M, Chason R, Ramilo O, Mejias A. 2010. Risk  
546 factors in children hospitalized with RSV bronchiolitis versus non-RSV bronchiolitis.  
547 *Pediatrics* 126:e1453-60.
- 548 3. Murray J, Bottle A, Sharland M, Modi N, Aylin P, Majeed A, Saxena S, Medicines for Neonates  
549 Investigator G. 2014. Risk factors for hospital admission with RSV bronchiolitis in England: a  
550 population-based birth cohort study. *PLoS One* 9:e89186.
- 551 4. Zhang W, Zhang L, Zan Y, Du N, Yang Y, Tien P. 2015. Human respiratory syncytial virus  
552 infection is inhibited by IFN-induced transmembrane proteins. *J Gen Virol* 96:170-82.
- 553 5. Smith SE, Busse DC, Binter S, Weston S, Diaz Soria C, Laksono BM, Clare S, Van Nieuwkoop S,  
554 Van den Hoogen BG, Clement M, Marsden M, Humphreys IR, Marsh M, de Swart RL, Wash  
555 RS, Tregoning JS, Kellam P. 2019. Interferon-Induced Transmembrane Protein 1 Restricts  
556 Replication of Viruses That Enter Cells via the Plasma Membrane. *J Virol* 93.
- 557 6. Subramanian G, Kuzmanovic T, Zhang Y, Peter CB, Veleparambil M, Chakravarti R, Sen GC,  
558 Chattopadhyay S. 2018. A new mechanism of interferon's antiviral action: Induction of  
559 autophagy, essential for paramyxovirus replication, is inhibited by the interferon stimulated  
560 gene, TDRD7. *PLOS Pathogens* 14:e1006877.
- 561 7. Behera AK, Kumar M, Lockey RF, Mohapatra SS. 2002. 2'-5' Oligoadenylate synthetase plays  
562 a critical role in interferon-gamma inhibition of respiratory syncytial virus infection of human  
563 epithelial cells. *J Biol Chem* 277:25601-8.
- 564 8. McDonald JU, Kafrou M, Clare S, Hale C, Ivanova M, Huntley D, Dorner M, Wright VJ, Levin  
565 M, Martinon-Torres F, Herberg JA, Tregoning JS. 2016. A Simple Screening Approach To



- 566 Prioritize Genes for Functional Analysis Identifies a Role for Interferon Regulatory Factor 7 in  
567 the Control of Respiratory Syncytial Virus Disease. *mSystems* 1.
- 568 9. Takahashi K, Kitamura N, Shibui T, Kamizono M, Matsui R, Yoshiyama Y, Maeda T, Kondo J,  
569 Honda Y, Yamada E, et al. 1990. Cloning, sequencing and expression in *Escherichia coli* of  
570 cDNA for a non-A, non-B hepatitis-associated microtubular aggregates protein. *J Gen Virol*  
571 71 ( Pt 9):2005-11.
- 572 10. Honda Y, Kondo J, Maeda T, Yoshiyama Y, Yamada E, Shimizu YK, Shikata T, Ono Y. 1990.  
573 Isolation and purification of a non-A, non-B hepatitis-associated microtubular aggregates  
574 protein. *J Gen Virol* 71 ( Pt 9):1999-2004.
- 575 11. Carlton-Smith C, Elliott RM. 2012. Viperin, MTAP44, and protein kinase R contribute to the  
576 interferon-induced inhibition of Bunyamwera Orthobunyavirus replication. *J Virol* 86:11548-  
577 57.
- 578 12. Power D, Santoso N, Dieringer M, Yu J, Huang H, Simpson S, Seth I, Miao H, Zhu J. 2015. IFI44  
579 suppresses HIV-1 LTR promoter activity and facilitates its latency. *Virology* 481:142-50.
- 580 13. Hallen LC, Burki Y, Ebeling M, Broger C, Siegrist F, Oroszlan-Szovik K, Bohrmann B, Certa U,  
581 Foser S. 2007. Antiproliferative activity of the human IFN-alpha-inducible protein IFI44. *J*  
582 *Interferon Cytokine Res* 27:675-80.
- 583 14. Schoggins JW, Wilson SJ, Panis M, Murphy MY, Jones CT, Bieniasz P, Rice CM. 2011. A diverse  
584 range of gene products are effectors of the type I interferon antiviral response. *Nature*  
585 472:481-5.
- 586 15. Imgenberg-Kreuz J, Sandling JK, Almlof JC, Nordlund J, Signer L, Norheim KB, Omdal R,  
587 Ronnblom L, Eloranta ML, Syvanen AC, Nordmark G. 2016. Genome-wide DNA methylation  
588 analysis in multiple tissues in primary Sjogren's syndrome reveals regulatory effects at  
589 interferon-induced genes. *Annals of the Rheumatic Diseases* 75:2029-2036.
- 590 16. Yeung KS, Chung BHY, Choufani S, Mok MY, Wong WL, Mak CCY, Yang WL, Lee PPW, Wong  
591 WHS, Chen YA, Grafodatskaya D, Wong RWS, Lau CS, Chan DTM, Weksberg R, Lau YL. 2017.  
592 Genome-Wide DNA Methylation Analysis of Chinese Patients with Systemic Lupus  
593 Erythematosus Identified Hypomethylation in Genes Related to the Type I Interferon  
594 Pathway. *Plos One* 12.
- 595 17. Zhao M, Zhou Y, Zhu BC, Wan MJ, Jiang TT, Tan QQ, Liu Y, Jiang JQ, Luo SHT, Tan YX, Wu HJ,  
596 Renauer P, Gutierrez MDA, Palma MJC, Castro RO, Fernandez-Roldan C, Raya E, Faria R,  
597 Carvalho C, Alarcon-Riquelme ME, Xiang ZY, Chen JW, Li F, Ling GH, Zhao HJ, Liao XP, Lin YK,  
598 Sawalha AH, Lu QJ. 2016. IFI44L promoter methylation as a blood biomarker for systemic  
599 lupus erythematosus. *Annals of the Rheumatic Diseases* 75:1998-2006.
- 600 18. Huang WC, Tung SL, Chen YL, Chen PM, Chu PY. 2018. IFI44L is a novel tumor suppressor in  
601 human hepatocellular carcinoma affecting cancer stemness, metastasis, and drug resistance  
602 via regulating met/Src signaling pathway. *BMC Cancer* 18:609.
- 603 19. Li H, Wang X, Fang Y, Huo Z, Lu X, Zhan X, Deng X, Peng C, Shen B. 2017. Integrated  
604 expression profiles analysis reveals novel predictive biomarker in pancreatic ductal  
605 adenocarcinoma. *Oncotarget* doi:10.18632/oncotarget.16732.
- 606 20. Haralambieva IH, Ovsyannikova IG, Kennedy RB, Larrabee BR, Zimmermann MT, Grill DE,  
607 Schaid DJ, Poland GA. 2017. Genome-wide associations of CD46 and IFI44L genetic variants  
608 with neutralizing antibody response to measles vaccine. *Hum Genet* 136:421-435.
- 609 21. Herberg JA, Kaforou M, Wright VJ, Shailes H, Eleftherohorinou H, Hoggart CJ, Cebey-Lopez  
610 M, Carter MJ, Janes VA, Gormley S, Shimizu C, Tremoulet AH, Barendregt AM, Salas A,  
611 Kanegaye J, Pollard AJ, Faust SN, Patel S, Kuijpers T, Martinon-Torres F, Burns JC, Coin LJ,  
612 Levin M, Consortium I. 2016. Diagnostic Test Accuracy of a 2-Transcript Host RNA Signature  
613 for Discriminating Bacterial vs Viral Infection in Febrile Children. *JAMA* 316:835-45.
- 614 22. Barrett T, Wilhite SE, Ledoux P, Evangelista C, Kim IF, Tomaszewsky M, Marshall KA, Phillippy  
615 KH, Sherman PM, Holko M, Yefanov A, Lee H, Zhang N, Robertson CL, Serova N, Davis S,

- 616 Soboleva A. 2013. NCBI GEO: archive for functional genomics data sets--update. *Nucleic*  
617 *Acids Res* 41:D991-5.
- 618 23. Davis S, Meltzer PS. 2007. GEOquery: a bridge between the Gene Expression Omnibus (GEO)  
619 and BioConductor. *Bioinformatics* 23:1846-7.
- 620 24. Team RC. 2018. R: A language and environment for statistical computing. , R Foundation for  
621 Statistical Computing, Vienna, Austria, <https://www.R-project.org/>.
- 622 25. Du P, Kibbe WA, Lin SM. 2008. lumi: a pipeline for processing Illumina microarray.  
623 *Bioinformatics* 24:1547-8.
- 624 26. Hallak LK, Spillmann D, Collins PL, Peeples ME. 2000. Glycosaminoglycan sulfation  
625 requirements for respiratory syncytial virus infection. *J Virol* 74:10508-13.
- 626 27. Livak KJ, Schmittgen TD. 2001. Analysis of relative gene expression data using real-time  
627 quantitative PCR and the 2<sup>-Delta Delta C(T)</sup> Method. *Methods* 25:402-8.
- 628 28. Sanjana NE, Shalem O, Zhang F. 2014. Improved vectors and genome-wide libraries for  
629 CRISPR screening. *Nat Methods* 11:783-4.
- 630 29. Sievers F, Wilm A, Dineen D, Gibson TJ, Karplus K, Li WZ, Lopez R, McWilliam H, Remmert M,  
631 Soding J, Thompson JD, Higgins DG. 2011. Fast, scalable generation of high-quality protein  
632 multiple sequence alignments using Clustal Omega. *Molecular Systems Biology* 7.
- 633 30. Richard CA, Rincheval V, Lassoued S, Fix J, Cardone C, Esneau C, Nekhai S, Galloux M,  
634 Rameix-Welti MA, Sizun C, Eleouet JF. 2018. RSV hijacks cellular protein phosphatase 1 to  
635 regulate M2-1 phosphorylation and viral transcription. *PLoS Pathog* 14:e1006920.
- 636 31. Skarnes WC, Rosen B, West AP, Koutsourakis M, Bushell W, Iyer V, Mujica AO, Thomas M,  
637 Harrow J, Cox T, Jackson D, Severin J, Biggs P, Fu J, Nefedov M, de Jong PJ, Stewart AF,  
638 Bradley A. 2011. A conditional knockout resource for the genome-wide study of mouse gene  
639 function. *Nature* 474:337-42.
- 640 32. Daumke O, Praefcke GJ. 2016. Invited review: Mechanisms of GTP hydrolysis and  
641 conformational transitions in the dynamin superfamily. *Biopolymers* 105:580-93.
- 642 33. McDowell IC, Modak TH, Lane CE, Gomez-Chiarri M. 2016. Multi-species protein similarity  
643 clustering reveals novel expanded immune gene families in the eastern oyster *Crassostrea*  
644 *virginica*. *Fish Shellfish Immunol* 53:13-23.
- 645 34. Praefcke GJ, Kloep S, Benschaid U, Lilie H, Prakash B, Herrmann C. 2004. Identification of  
646 residues in the human guanylate-binding protein 1 critical for nucleotide binding and  
647 cooperative GTP hydrolysis. *J Mol Biol* 344:257-69.
- 648 35. Garcia MA, Gil J, Ventoso I, Guerra S, Domingo E, Rivas C, Esteban M. 2006. Impact of  
649 protein kinase PKR in cell biology: from antiviral to antiproliferative action. *Microbiol Mol*  
650 *Biol Rev* 70:1032-60.
- 651 36. Wong MT, Chen SS. 2016. Emerging roles of interferon-stimulated genes in the innate  
652 immune response to hepatitis C virus infection. *Cell Mol Immunol* 13:11-35.
- 653 37. Gibbs JD, Ornoff DM, Igo HA, Zeng JY, Imani F. 2009. Cell Cycle Arrest by Transforming  
654 Growth Factor beta 1 Enhances Replication of Respiratory Syncytial Virus in Lung Epithelial  
655 Cells. *Journal of Virology* 83:12424-12431.
- 656 38. Bian T, Gibbs JD, Orvell C, Imani F. 2012. Respiratory syncytial virus matrix protein induces  
657 lung epithelial cell cycle arrest through a p53 dependent pathway. *PLoS One* 7:e38052.
- 658 39. Gibbs JD, Ornoff DM, Igo HA, Zeng JY, Imani F. 2009. Cell cycle arrest by transforming growth  
659 factor beta1 enhances replication of respiratory syncytial virus in lung epithelial cells. *J Virol*  
660 83:12424-31.
- 661 40. Russell RF, McDonald JU, Ivanova M, Zhong Z, Bukreyev A, Tregoning JS. 2015. Partial  
662 Attenuation of Respiratory Syncytial Virus with a Deletion of a Small Hydrophobic Gene Is  
663 Associated with Elevated Interleukin-1beta Responses. *J Virol* 89:8974-81.
- 664 41. Groves HT, Higham SL, Moffatt MF, Cox MJ, Tregoning JS. 2020. Respiratory Viral Infection  
665 Alters the Gut Microbiota by Inducing Inappetence. *mBio* 11:e03236-19.

- 666 42. DeDiego ML, Nogales A, Martinez-Sobrido L, Topham DJ. 2019. Interferon-Induced Protein  
667 44 Interacts with Cellular FK506-Binding Protein 5, Negatively Regulates Host Antiviral  
668 Responses, and Supports Virus Replication. *MBio* 10.
- 669 43. DeDiego ML, Martinez-Sobrido L, Topham DJ. 2019. NOVEL FUNCTIONS OF THE  
670 INTERFERON-INDUCED PROTEIN 44-LIKE (IFI44L) AS A FEEDBACK REGULATOR OF HOST  
671 ANTIVIRAL RESPONSES. *J Virol* doi:10.1128/jvi.01159-19.
- 672 44. Everitt AR, Clare S, McDonald JU, Kane L, Harcourt K, Ahras M, Lall A, Hale C, Rodgers A,  
673 Young DB, Haque A, Billker O, Tregoning JS, Dougan G, Kellam P. 2013. Defining the Range of  
674 Pathogens Susceptible to Ifitm3 Restriction Using a Knockout Mouse Model. *Plos One* 8.
- 675 45. Zhang YH, Zhao Y, Li N, Peng YC, Giannoulatou E, Jin RH, Yan HP, Wu H, Liu JH, Liu N, Wang  
676 DY, Shu YL, Ho LP, Kellam P, McMichael A, Dong T. 2013. Interferon-induced transmembrane  
677 protein-3 genetic variant rs12252-C is associated with severe influenza in Chinese  
678 individuals. *Nat Commun* 4:1418.
- 679 46. Everitt AR, Clare S, Pertel T, John SP, Wash RS, Smith SE, Chin CR, Feeley EM, Sims JS, Adams  
680 DJ, Wise HM, Kane L, Goulding D, Digard P, Anttila V, Baillie JK, Walsh TS, Hume DA, Palotie  
681 A, Xue Y, Colonna V, Tyler-Smith C, Dunning J, Gordon SB, Gen II, Investigators M, Smyth RL,  
682 Openshaw PJ, Dougan G, Brass AL, Kellam P. 2012. IFITM3 restricts the morbidity and  
683 mortality associated with influenza. *Nature* 484:519-23.
- 684 47. Casanova JL, Abel L. 2018. Human genetics of infectious diseases: Unique insights into  
685 immunological redundancy. *Seminars in Immunology* 36:1-12.
- 686 48. Thwaites RS, Coates M, Ito K, Ghazaly M, Feather C, Abdulla F, Tunstall T, Jain P, Cass L,  
687 Rapeport G, Hansel TT, Nadel S, Openshaw P. 2018. Reduced Nasal Viral Load and IFN  
688 Responses in Infants with Respiratory Syncytial Virus Bronchiolitis and Respiratory Failure.  
689 *Am J Respir Crit Care Med* 198:1074-1084.
- 690 49. Westra HJ, Peters MJ, Esko T, Yaghootkar H, Schurmann C, Kettunen J, Christiansen MW,  
691 Fairfax BP, Schramm K, Powell JE, Zhernakova A, Zhernakova DV, Veldink JH, Van den Berg  
692 LH, Karjalainen J, Withoff S, Uitterlinden AG, Hofman A, Rivadeneira F, 't Hoen PAC, Reinmaa  
693 E, Fischer K, Nelis M, Milani L, Melzer D, Ferrucci L, Singleton AB, Hernandez DG, Nalls MA,  
694 Homuth G, Nauck M, Radke D, Volker U, Perola M, Salomaa V, Brody J, Suchy-Dicey A,  
695 Gharib SA, Enquobahrie DA, Lumley T, Montgomery GW, Makino S, Prokisch H, Herder C,  
696 Roden M, Grallert H, Meitinger T, Strauch K, Li Y, Jansen RC, et al. 2013. Systematic  
697 identification of trans eQTLs as putative drivers of known disease associations. *Nature*  
698 *Genetics* 45:1238-U195.
- 699 50. Feenstra B, Pasternak B, Geller F, Carstensen L, Wang T, Huang F, Eitson JL, Hollegaard MV,  
700 Svanstrom H, Vestergaard M, Hougaard DM, Schoggins JW, Jan LY, Melbye M, Hviid A. 2014.  
701 Common variants associated with general and MMR vaccine-related febrile seizures. *Nat*  
702 *Genet* 46:1274-82.

703

704 **Figure Titles and Legends**

705 **Figure 1. IFI44 and IFI44L mRNA levels are reduced in the blood of infants with**  
706 **severe RSV infection. (a)** Demographic and clinical features of patient groups.  
707 Patients were febrile children with immunofluorescence-confirmed RSV infection.  
708 Patients with suspected or confirmed bacterial co-infection were excluded (n = 4). **(b)**  
709 IFI44 or **(c)** IFI44L mRNA expression levels, measured in blood PBMC by microarray  
710 in either patients admitted to a general ward with mild RSV illness or admitted to a  
711 paediatric intensive care unit (PICU) at the same hospital. \* P < 0.05, \*\* P < 0.01.  
712 Significance by unpaired t-test. **(d)** Pearson correlation analysis of expression of  
713 IFI44 and IFI44L. P < 0.001. **(e)** Volcano plot of fold change in gene expression by  
714 microarray between general hospital and intensive care admission.

715 **Figure 2. IFI44 and IFI44L are IFN-I responsive genes upregulated during RSV**  
716 **infection. (a)** *IFI44* and *IFI44L* mRNA expression in A549 cells treated with 500 IU  
717 ml<sup>-1</sup> IFNα2a or **(b)** infected with RSV A2 (m.o.i. 0.1) for 2-24 hours. N≥3. **(c)** IFI44  
718 and IFI44L protein levels in A549 cells treated with 0-1000 IU ml<sup>-1</sup> IFNα2a for 24 or  
719 48 hours. **(d)** RSV L gene copies in RSV infected A549 cells as for **b**. **(e)** A549 cells  
720 treated with IFNα2a for 16 hours prior to infection with RSV A2 (m.o.i. 0.1) for 24  
721 hours. Viral RNA relative to untreated controls. N=3. **(f)** 8-10-week-old BALB/c mice  
722 were infected intranasally with 2 x 10<sup>5</sup> pfu RSV A2. Change in expression of *Ifi44*  
723 and *Ifi44l* mRNA in infected mice relative to mice given PBS intranasally at the time  
724 of infection. **(g)** Total L gene copy number per µg RNA from whole lung tissue. N≥4  
725 animals per group at each time point. Data are presented as the mean +/- SEM.  
726 Significance relative to untreated controls (**a-b, e**), PBS-treated (**f**), or noted groups  
727 (**d, g**) assessed by ANOVA. \* P < 0.05, \*\* P < 0.01, \*\*\* P < 0.001, \*\*\*\* P < 0.0001.

728 **Figure 3. Overexpression of IFI44 or IFI44L reduces RSV infection.** (a) *IFI44*,  
729 *IFI44L*, and *Mx1* mRNA levels relative to *GAPDH* in stably transduced monoclonal  
730 A549 cells lines. Cells were cultured in normal growth medium or medium  
731 supplemented with 500 IU ml<sup>-1</sup> IFN $\alpha$ 2a for 24 hours. (b) Stably transduced cell lines  
732 were infected with rgRSV (m.o.i. 0.1 or 0.01) and infection assessed by flow  
733 cytometry after 24 hours. Representative experiment showing GFP<sup>+</sup> population of  
734 single RFP<sup>+</sup> cells. (c) RSV infection of stably transduced cell lines relative to the  
735 Vector control. N $\geq$ 5. (d) RSV L gene 24 hours post-infection with wild-type RSV A2  
736 relative to Vector control. (e) Viral titre (WT RSV A2) relative to Vector control in cell  
737 supernatant at 48 hpi by plaque assay. (f) A549 cells were transduced with either  
738 FLUC (Vector) or IFI44 lentivirus and expression of IFI44 detected by Western  
739 blotting after 48 hours. (g) Transduced A549 cells were infected with rgRSV (m.o.i.  
740 0.8) after 24 hours, and infectivity of transduced (RFP<sup>+</sup>) cells assessed 24 hours  
741 after infection. N=3. Individual points represent the result of an independent  
742 experiment. Bars show the mean +/- SEM. \* represents significance relative to cells  
743 transduced with empty vector, assessed by ANOVA (a) or ratio paired t-test (c-e).  
744 Analysis was done prior to data transformation. \* P < 0.05, \*\* P < 0.01, \*\*\* P < 0.001,  
745 \*\*\*\* P < 0.0001.

746 **Figure 4. Loss of IFI44 or IFI44L enhances RSV infection *in vitro*.** (a) *IFI44* and  
747 *IFI44L* mRNA expression after transfection with 50 nM esiRNA-IFI44 or a non-  
748 targeting esiRNA control (NT). 24 hours after transfection cells were treated with 500  
749 IU ml<sup>-1</sup> IFN $\alpha$ 2a for 16 hours prior to infection with RSV A2 (m.o.i. 0.1) for 48 hours.  
750 N=3. (b) L gene copy number assessed 48 hours after infection and shown relative  
751 to the NT control. N=5. (c) A549 monoclonal knockout cell lines were generated  
752 through CRISPR-Cas9 gene editing. IFI44 or IFI44L protein in wild-type cells treated

753 with IFN $\alpha$ 2a or monoclonal CRISPR-Cas9 edited A549 cells. **(d)** Cells were treated  
754 with 500 IU ml<sup>-1</sup> IFN $\alpha$ 2a 16 hours prior to infection with RSV A2 (m.o.i. 0.1 or 0.01)  
755 for 24 hours. RSV L gene copy number shown relative to the WT control. N=3. **(e)**  
756 Knockout cell lines were pre-treated with IFN $\alpha$ 2a as for **c** and subsequently infected  
757 with RSV A2 (m.o.i. 0.1) for 48 hours. Viral titre in cell supernatant relative to the WT  
758 control. N=3. Points represent a single independent experiment with a bar at the  
759 mean +/- SEM. Significance relative to the WT or NT controls by ratio paired T test.  
760 Analysis was done prior to data transformation. \* P < 0.05, \*\* P < 0.01. ns = not  
761 significant.

762 **Figure 5. IFI44 and IFI44L are anti-proliferative.** A549 monoclonal knockout cell  
763 lines were seeded at equal densities and viable cell number quantified after 6-48  
764 hours using a colorimetric metabolic activity assay **(a)** or by trypan blue exclusion (#  
765 P < 0.05 between  $\Delta$ IFI44L and vector). **(b)**. A549 stably transduced monoclonal cell  
766 lines expressing IFI44, IFI44L, or transduced with empty vector were seeded at  
767 equal densities and viable cell number quantified 24 hours later by colorimetric  
768 metabolic activity assay **(c)** or after 6-48h by trypan blue exclusion **(d)** (\* P <0.05,  
769 \*\*\*\* P < 0.0001 between IFI44 and vector, # P <0.05, ## P <0.01 between IFI44L and  
770 vector) N $\geq$ 3. **(e)** Representative histograms of stably transduced A549 cell lines  
771 treated with CellTrace Violet and allowed to proliferate for 72 hours before analysis  
772 by flow cytometry. WT cells were stained or treated with vehicle only and  
773 immediately fixed prior to analysis for positive (red) and negative (grey) controls. **(f)**  
774 Mean fluorescence intensity (MFI) of cell trace violet quantified relative to Vector  
775 control over three independent repeats. Cytotoxicity was assessed by LDH release  
776 assay 24-48 hours after plating in overexpression **(g)** or knockout cells **(h)**. N=3.  
777 Significance to WT or Vector controls assessed by ratio paired T test prior to data



778 transformation. Points represent a single independent experiment with a bar at the  
779 mean +/- SEM. \* P < 0.05, \*\* < P < 0.01, \*\*\* P < 0.001, \*\*\*\* P < 0.0001 in panels a, c  
780 and f between indicated bar and vector.

781

782 **Figure 6. IFI44 and IFI44L reduce RSV polymerase activity and restrict**

783 **infection independent of GTP-binding. (a)** Stably transduced A549 cells were

784 infected with rgRSV (m.o.i. 0.1) for 8 hours and infectivity assessed by measuring

785 the percentage of RFP<sup>+</sup> single cells that were GFP<sup>+</sup>. Representative dot plot from a

786 single independent experiment. Population shown was gated for single RFP<sup>+</sup> cells.

787 **(b)** Quantification of rgRSV infection relative to Vector transduced control as

788 described in **a**. N=3. **(c)** Stably transduced A549 cell lines were incubated with RSV

789 A2 (m.o.i. 2) for 1 hour at 4 °C then harvested for analysis of RSV L gene copy

790 number. N=3. **(d)** Stably transduced 293T cell lines were transfected with pSV-β-Gal,

791 pCAGGS-T7, the pGEM3-Gaussia/Firefly minigenome and plasmids encoding RSV

792 M2-1, P, L, and N. 24 hours later FLUC activity was assessed and normalised to the

793 negative control and β-Galactosidase expression levels. Normalised FLUC activity

794 shown relative to polyclonal parental 293T cells (WT). N=3. **(e)** ClustalW multiple

795 sequence alignment of human IFI44 and IFI44L. Four sections were selected to

796 show the residues predicted to be essential for GTP binding and GTPase function

797 (highlighted by a red box). Consensus sequence for each G1-G4 region shown

798 below. **(f)** A549 cells were transduced with  $2 \times 10^5$  TU lentivirus expressing either WT

799 IFI44, IFI44Δ193-201 (G1 region deleted), or FLUC (Vector). 24 hours later cells

800 were infected with rgRSV (m.o.i. 0.8) and infectivity assessed as for **a** 24 hours after

801 infection. N=3. Significance to Vector transduced or WT controls assessed by ratio

802 paired t-test prior to data transformation. Points represent a single independent

803 experiment with a bar at the mean +/- SEM \* P < 0.05, \*\* < P < 0.01. ns = not  
804 significant.

805 **Figure 7. RSV infection severity is enhanced in an *Ifi44*<sup>-/-</sup> mouse model. (a)**

806 Wildtype or *Ifi44*<sup>-/-</sup> C57BL/6N mice were infected intranasally with 1 x 10<sup>5</sup> pfu RSV

807 A2. Weight loss was monitored for 7 days. **(b)** BALF and **(c)** lung cell counts. **(d)**

808 Viral load assessed by RSV L gene qPCR. **(e)** IL-6 and IL-1β levels at day 4 post-

809 infection measured by ELISA. Volcano plot of inflammatory cytokines at day 4 **(f)** and

810 day 7 **(g)** by multiplex ELISA. **(g)** *Ifnβ* and **(h)** *Ifnγ* mRNA relative to *Gapdh* (2<sup>-ΔCt</sup>).

811 Box plots show a line at the median and box edges from the 25<sup>th</sup> to 75<sup>th</sup> percentiles,

812 with whiskers from the 5<sup>th</sup> to 95<sup>th</sup> percentiles (Prism). N≥4 animals at each time

813 point. Two independent experiments. Significance by ANOVA **(a-e, h-i)** or Student's t-

814 test **(f-g)**. \* P < 0.05, \*\* 0.01, \*\*\* P < 0.001.



**a**

|                                | General        | PICU            | Significance |
|--------------------------------|----------------|-----------------|--------------|
| Number of patients             | 6              | 12              |              |
| Age: Months - Median (IQR)     | 13 (0-26)      | 1.5 (1-2)       | *            |
| Sex: Male - No. (%)            | 4 (67%)        | 7 (58%)         | NS           |
| Ethnicity: Caucasian - No. (%) | 1 (17%)        | 7 (58%)         | NS           |
| Deaths - No. (%)               | 0 (0%)         | 0 (0%)          | NS           |
| Neutrophil % - Median (IQR)    | 5.1% (2.8-6.4) | 3.5% (3.1-12.3) | NS           |
| Lymphocyte % - Median (IQR)    | 3.3% (1.5-5.7) | 4.3% (1.9-6.8)  | NS           |
| Monocyte % - Median (IQR)      | 0.9% (0.8-1.4) | 0.7% (0.4-1.4)  | NS           |

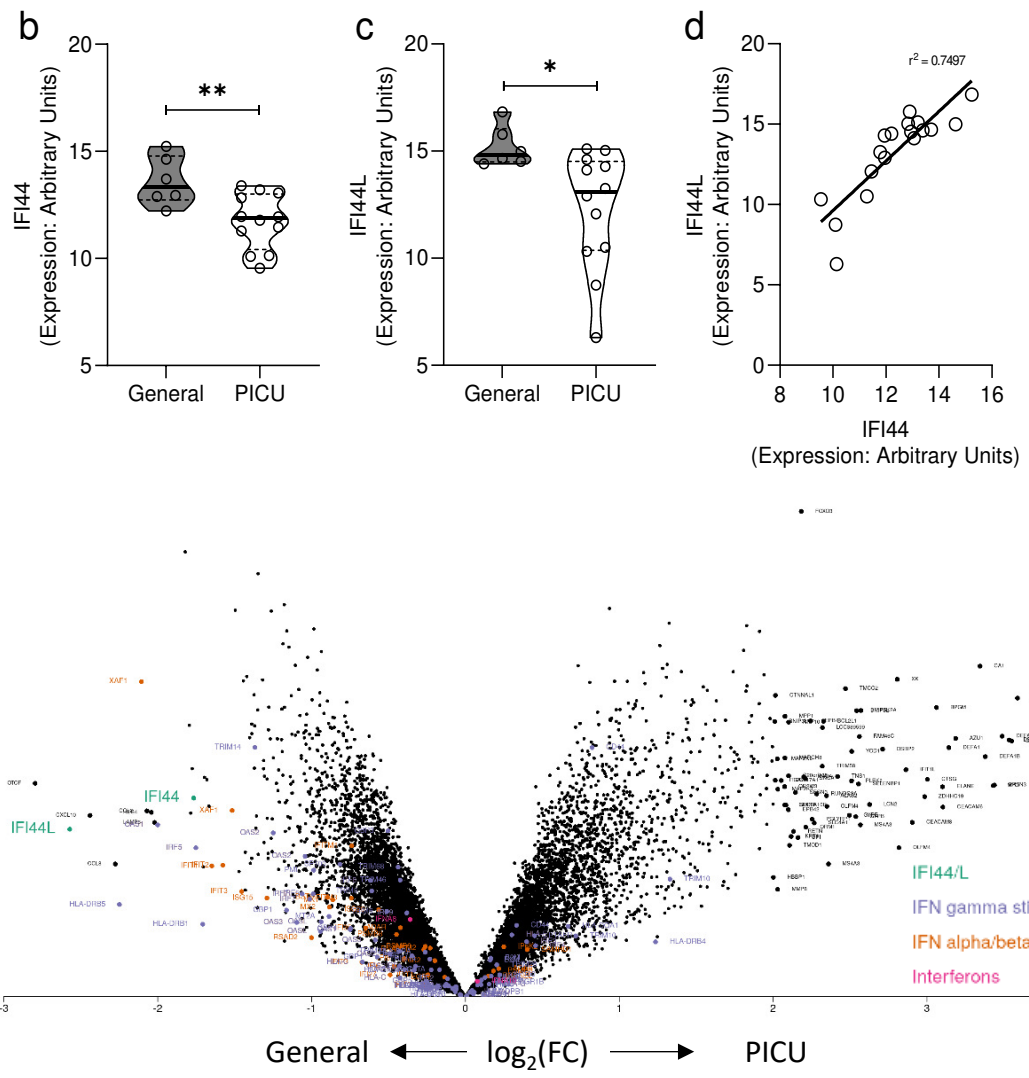

**Figure 1. IFI44 and IFI44L mRNA levels are reduced in the blood of infants with severe RSV infection. (a)** Demographic and clinical features of patient groups. Patients were febrile children with immunofluorescence-confirmed RSV infection. Patients with suspected or confirmed bacterial co-infection were excluded (n = 4). **(b)** IFI44 or **(c)** IFI44L RNA expression levels, measured by in blood PBMC by microarray in either patients admitted to a general ward with mild RSV illness or admitted to a paediatric intensive care unit (PICU) at the same hospital. \* P < 0.05, \*\* P < 0.01. Significance by unpaired t-test. **(d)** Pearson correlation analysis of expression of IFI44 and IFI44L. P < 0.001. **(e)** Volcano plot of fold change in gene expression by microarray between general hospital and intensive care admission.

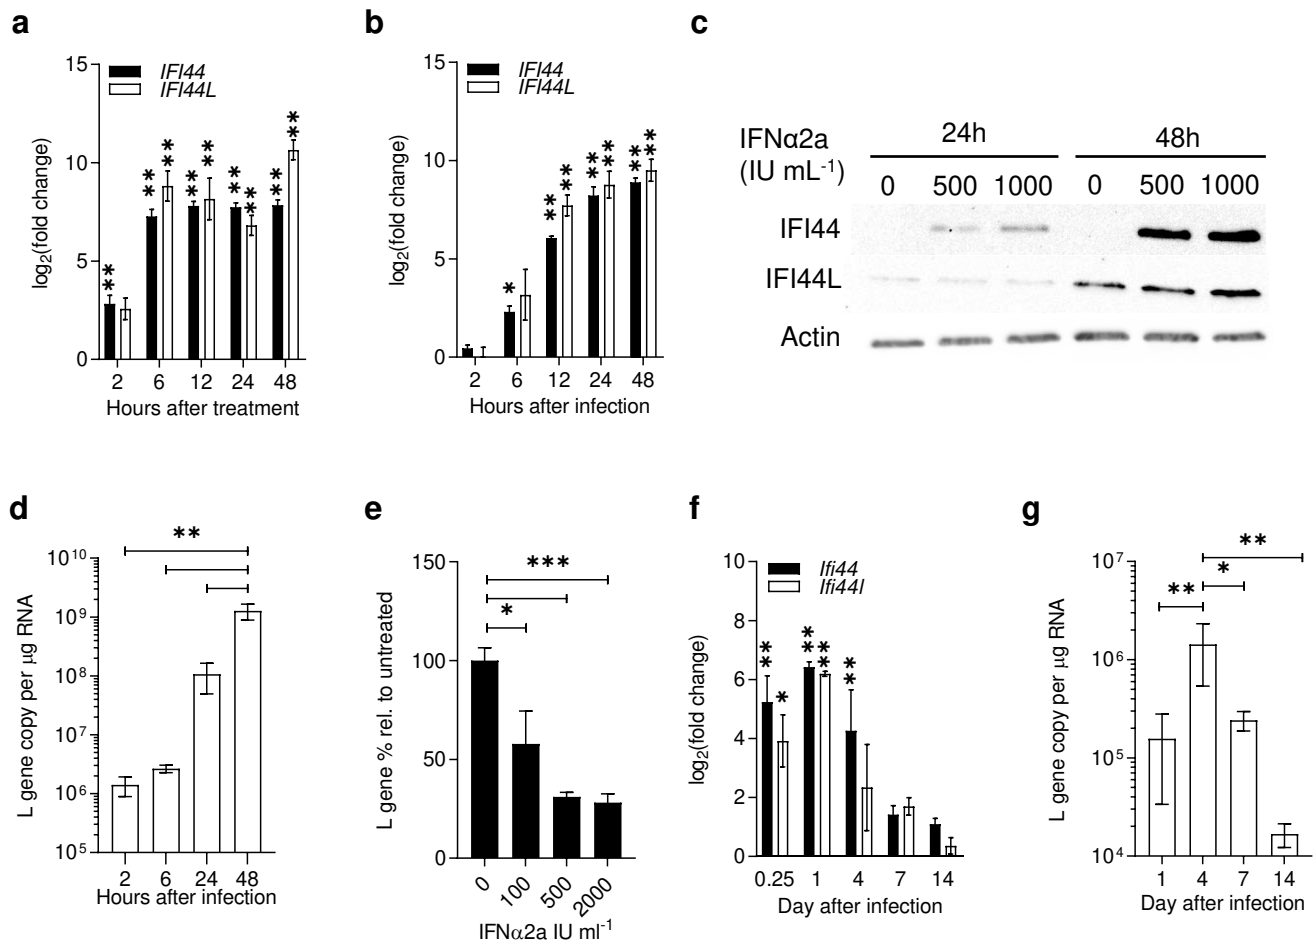

**Figure 2. *IFI44* and *IFI44L* are IFN-I responsive genes upregulated during RSV infection.**

(a) *IFI44* and *IFI44L* mRNA expression in A549 cells treated with 500 IU mL<sup>-1</sup> IFNα2a or (b) infected with RSV A2 (m.o.i. 0.1) for 2-24 hours. N≥3. (c) *IFI44* and *IFI44L* protein levels in A549 cells treated with 0-1000 IU mL<sup>-1</sup> IFNα2a for 24 or 48 hours. (d) RSV L gene copies in RSV infected A549 cells as for (b). N≥3. (e) A549 cells treated with IFNα2a for 16 hours prior to infection with RSV A2 (m.o.i. 0.1) for 24 hours. Viral RNA relative to untreated controls. N=3. (f) 8-10 week old BALB/c mice were infected intranasally with 2 × 10<sup>5</sup> pfu RSV A2. Change in expression of *Ifi44* and *Ifi44l* mRNA in infected mice relative to mice given PBS intranasally at the time of infection. (g) Total L gene copy number per μg RNA from whole lung tissue. N≥4 animals per group at each time point. Data are presented as the mean ± SEM. Significance relative to untreated controls (a, b, e), PBS-treated (f), or noted groups (d, g) assessed by ANOVA. \* P < 0.05, \*\* P < 0.01, \*\*\* P < 0.001.

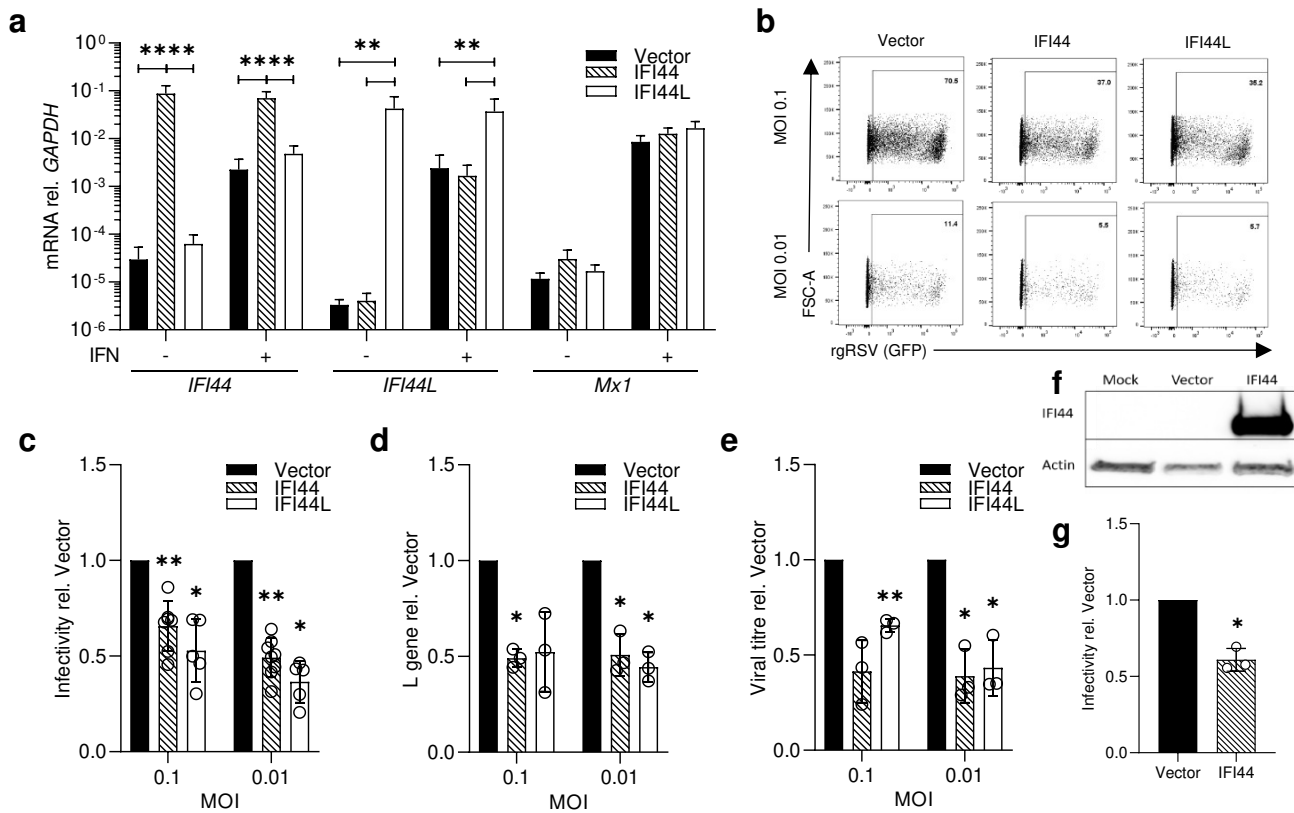

**Figure 3. Overexpression of IFI44 or IFI44L reduces RSV infection.** (a) *IFI44*, *IFI44L*, and *Mx1* mRNA levels relative to *GAPDH* in stably transduced overexpressing monoclonal A549 cells lines. Cells were cultured in normal growth medium or medium supplemented with 500 IU mL<sup>-1</sup> IFN $\alpha$ 2a for 24 hours. (b) Stably transduced cell lines were infected with rgRSV (m.o.i. 0.1 or 0.01) and infectivity assessed by flow cytometry after 24 hours. Representative experiment showing GFP<sup>+</sup> population of single RFP<sup>+</sup> cells. (c) RSV infection of stably transduced cell lines relative to the Vector control. N $\geq$ 5. (d) RSV L gene 24 hours post-infection with wild-type RSV A2 relative to Vector control. (e) Viral titre (WT RSV A2) relative to Vector control in cell supernatant at 48 hpi by plaque assay. (f) A549 cells were transduced with either FLUC (Vector) or IFI44 lentivirus and expression of IFI44 detected by Western blotting after 48 hours. (g) Transduced A549 cells were infected with rgRSV (m.o.i. 0.8) after 24 hours, and infectivity of transduced (RFP<sup>+</sup>) cells assessed 24 hours after infection. N=3. Individual points represent the result of an independent experiment. Bars show the mean  $\pm$  SEM. \* represents significance relative to cells transduced with empty vector, assessed by ANOVA (a) or ratio paired T test (c-e). Analysis was done prior to data transformation. \* P < 0.05, \*\* P < 0.01, \*\*\* P < 0.001, \*\*\*\* P < 0.0001.

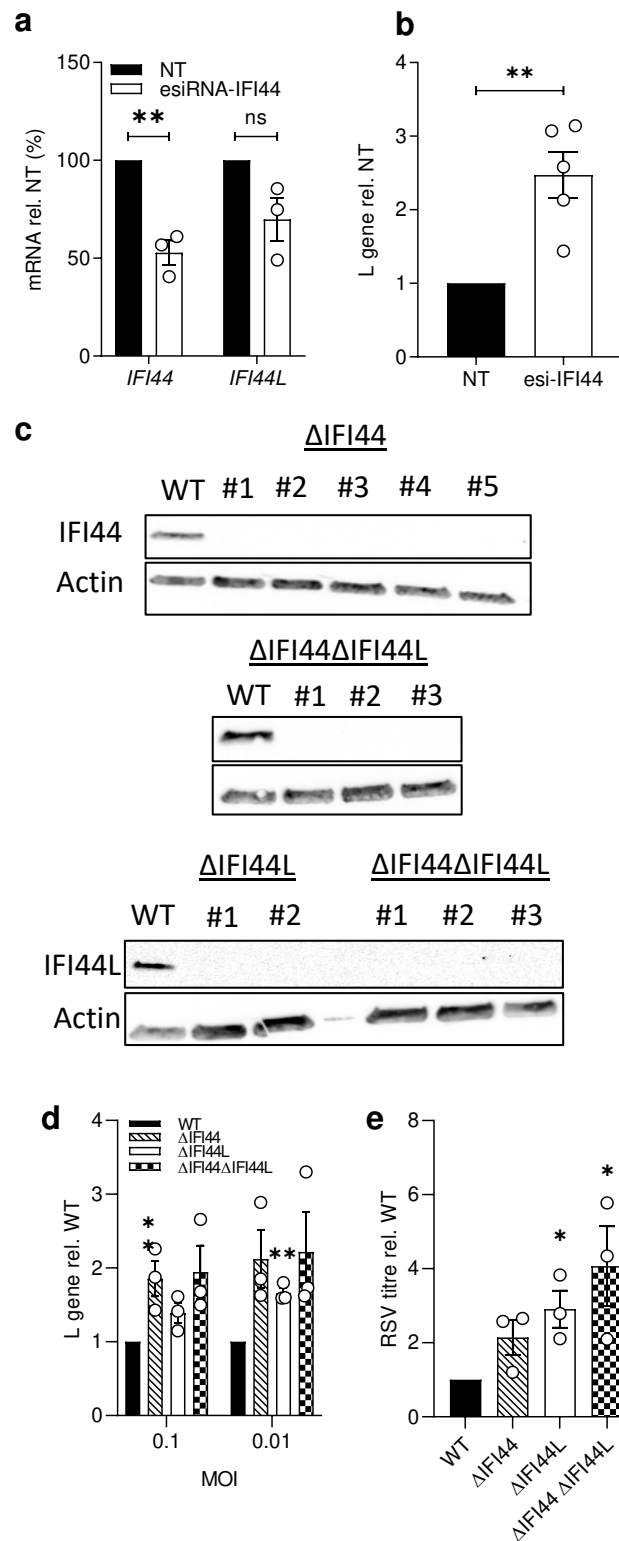

**Figure 4. Loss of IFI44 expression enhances RSV infection *in vitro*.** (a) *IFI44* and *IFI44L* mRNA expression after transfection with 50 nM esiRNA-IFI44 or a non-targeting esiRNA control (NT). 24 hours after transfection cells were treated with 500 IU mL<sup>-1</sup> IFN $\alpha$ 2a for 16 hours prior to infection with RSV A2 (m.o.i. 0.1) for 48 hours. N=3. (b) L gene copy number assessed 48 hours after infection and shown relative to the NT control. N=5. (c) A549 monoclonal knockout cell lines were generated through CRISPR-Cas9 gene editing. IFI44 or IFI44L protein in wild-type cells treated with IFN $\alpha$ 2a or monoclonal CRISPR-Cas9 edited A549 cells. (d) Cells were treated with 500 IU mL<sup>-1</sup> IFN $\alpha$ 2a 16 hours prior to infection with RSV A2 (m.o.i. 0.1 or 0.01) for 24 hours. RSV L gene copy number shown relative to the WT control. N=3. (e) Knockout cell lines were pre-treated with IFN $\alpha$ 2a as for c and subsequently infected with RSV A2 (m.o.i. 0.1) for 48 hours. Viral titre in cell supernatant relative to the WT control. N=3. Points represent a single independent experiment with a bar at the mean  $\pm$  SEM. Significance relative to the WT or NT controls by ratio paired T test. Analysis was done prior to data transformation. \* P < 0.05, \*\* P < 0.01. ns = not significant.

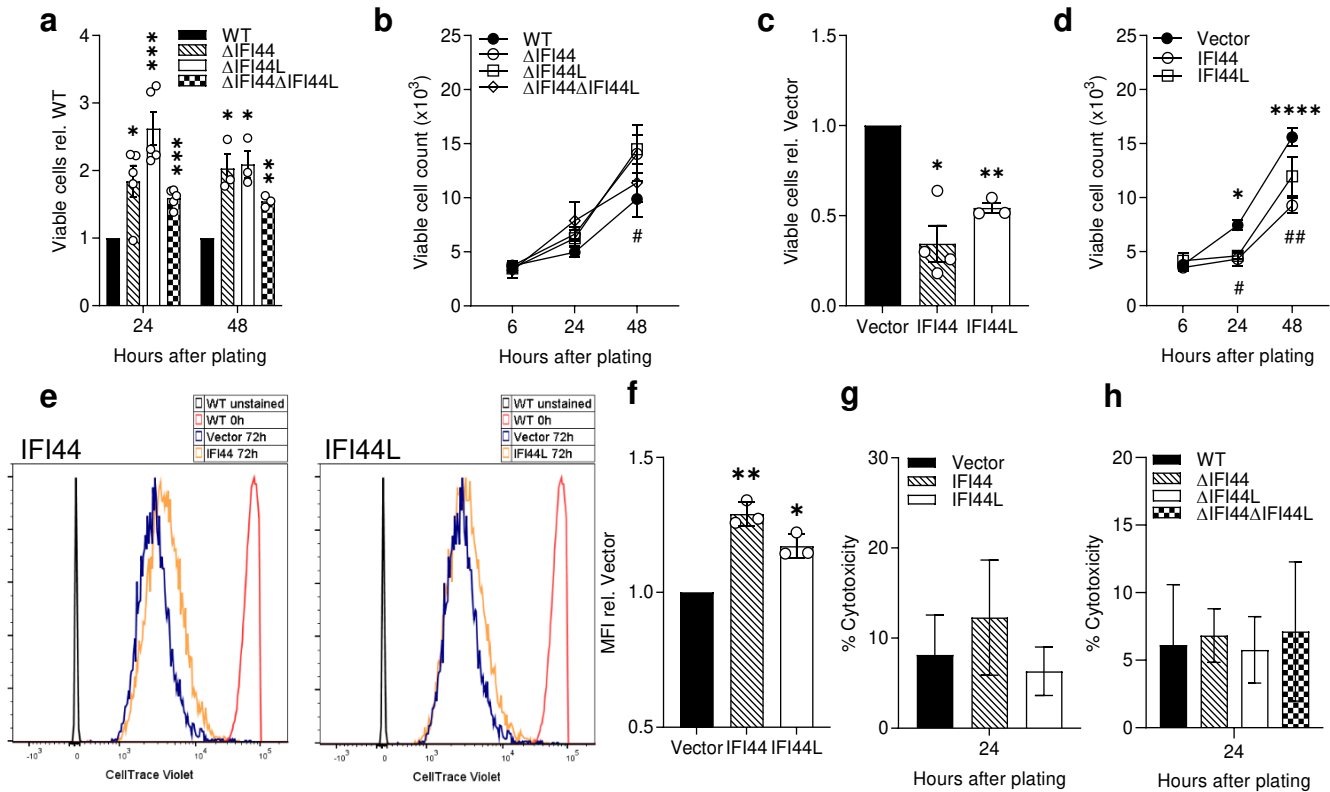

**Figure 5. IFI44 and IFI44L are anti-proliferative.** A549 monoclonal knockout cell lines were seeded at equal densities and viable cell number quantified after 6-48 hours using a colorimetric metabolic activity assay (a) or by trypan blue exclusion (#  $P < 0.05$  between  $\Delta$ IFI44L and vector). (b). A549 stably transduced monoclonal cell lines expressing IFI44, IFI44L, or transduced with empty vector were seeded at equal densities and viable cell number quantified 24 hours later by colorimetric metabolic activity assay (c) or after 6-48h by trypan blue exclusion (d) (\*  $P < 0.05$ , \*\*\*\*  $P < 0.0001$  between IFI44 and vector, #  $P < 0.05$ , ##  $P < 0.01$  between IFI44L and vector)  $N \geq 3$ . (e) Representative histograms of stably transduced A549 cell lines treated with CellTrace Violet and allowed to proliferate for 72 hours before analysis by flow cytometry. WT cells were stained or treated with vehicle only and immediately fixed prior to analysis for positive (red) and negative (grey) controls. (f) Mean fluorescence intensity (MFI) of cell trace violet quantified relative to Vector control over three independent repeats. Cytotoxicity was assessed by LDH release assay 24-48 hours after plating in overexpression (g) or knockout cells (h).  $N = 3$ . Significance to WT or Vector controls assessed by ratio paired T test prior to data transformation. Points represent a single independent experiment with a bar at the mean  $\pm$  SEM. \*  $P < 0.05$ , \*\*  $P < 0.01$ , \*\*\*  $P < 0.001$ , \*\*\*\*  $P < 0.0001$  in panels a, c and f between indicated bar and vector.

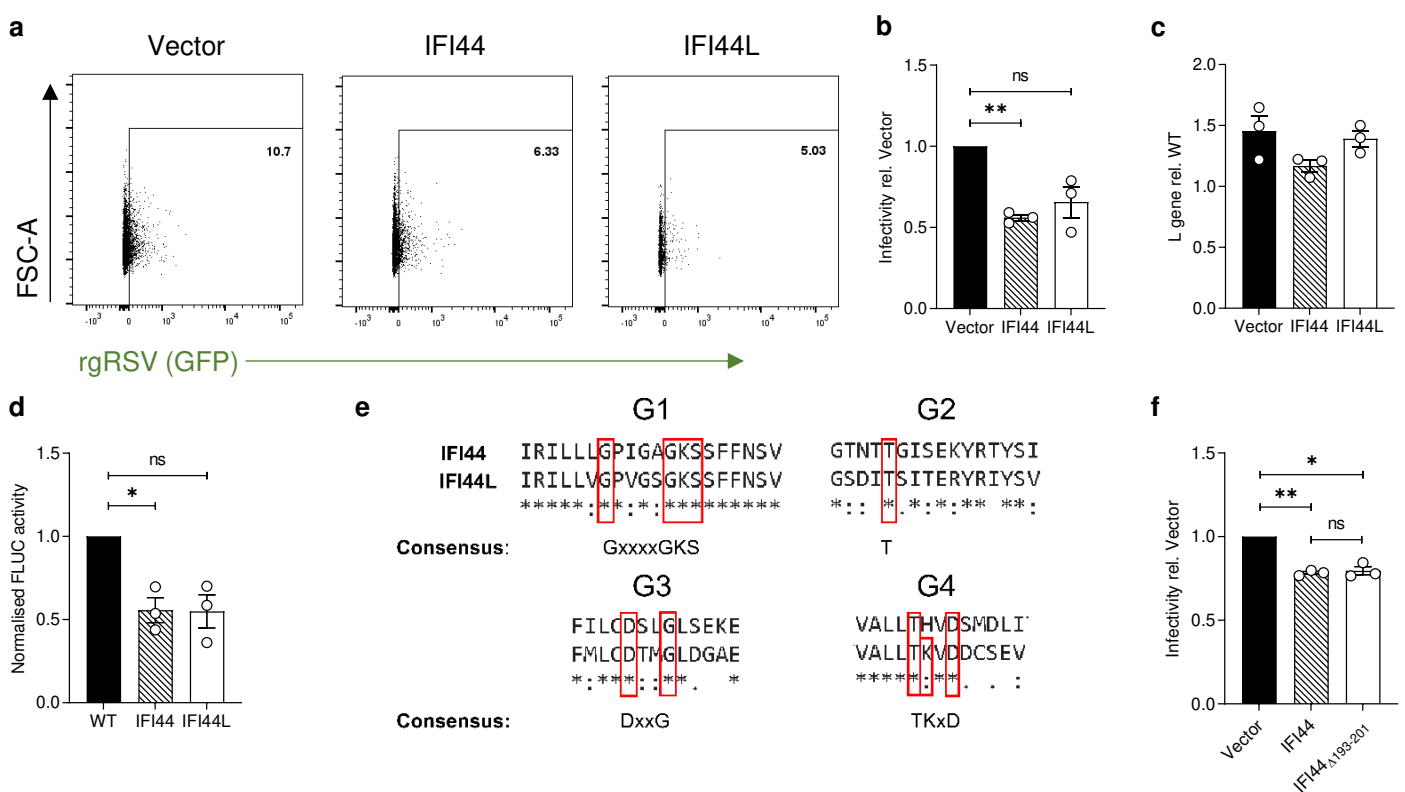

**Figure 6. IFI44 and IFI44L reduce RSV polymerase activity and restrict infection independent of GTP-binding.** (a) Stably transduced A549 cells were infected with rgRSV (m.o.i. 0.1) for 8 hours and infectivity assessed by measuring the percentage of RFP+ single cells that were GFP+. Representative dot plot from a single independent experiment. Population shown was gated for single RFP+ cells. (b) Quantification of rgRSV infection relative to Vector transduced control as described in a. N=3. (c) Stably transduced A549 cell lines were incubated with RSV A2 (m.o.i. 2) for 1 hour at 4 °C then harvested for analysis of RSV L gene copy number. N=3. (d) Stably transduced 293T cell lines were transfected with pSV-β-Gal, pCAGGS-T7, the pGEM3-Gaussia/Firefly minigenome and plasmids encoding RSV M2-1, P, L, and N. 24 hours later FLUC activity was assessed and normalised to the negative control and β-Galactosidase expression levels. Normalised FLUC activity shown relative to polyclonal parental 293T cells (WT). N=3. (e) ClustalW multiple sequence alignment of human IFI44 and IFI44L. Four sections were selected to show the residues predicted to be essential for GTP binding and GTPase function (highlighted by a red box). Consensus sequence for each G1-G4 region shown below. (f) A549 cells were transduced with 2x10<sup>5</sup> TU lentivirus expressing either WT IFI44, IFI44Δ193-201 (G1 region deleted), or FLUC (Vector). 24 hours later cells were infected with rgRSV (m.o.i. 0.8) and infectivity assessed as for a 24 hours after infection. N=3. Significance to Vector transduced or WT controls assessed by ratio paired T test prior to data transformation. Points represent a single independent experiment with a bar at the mean +/- SEM \* P < 0.05, \*\* < P < 0.01. ns = not significant.

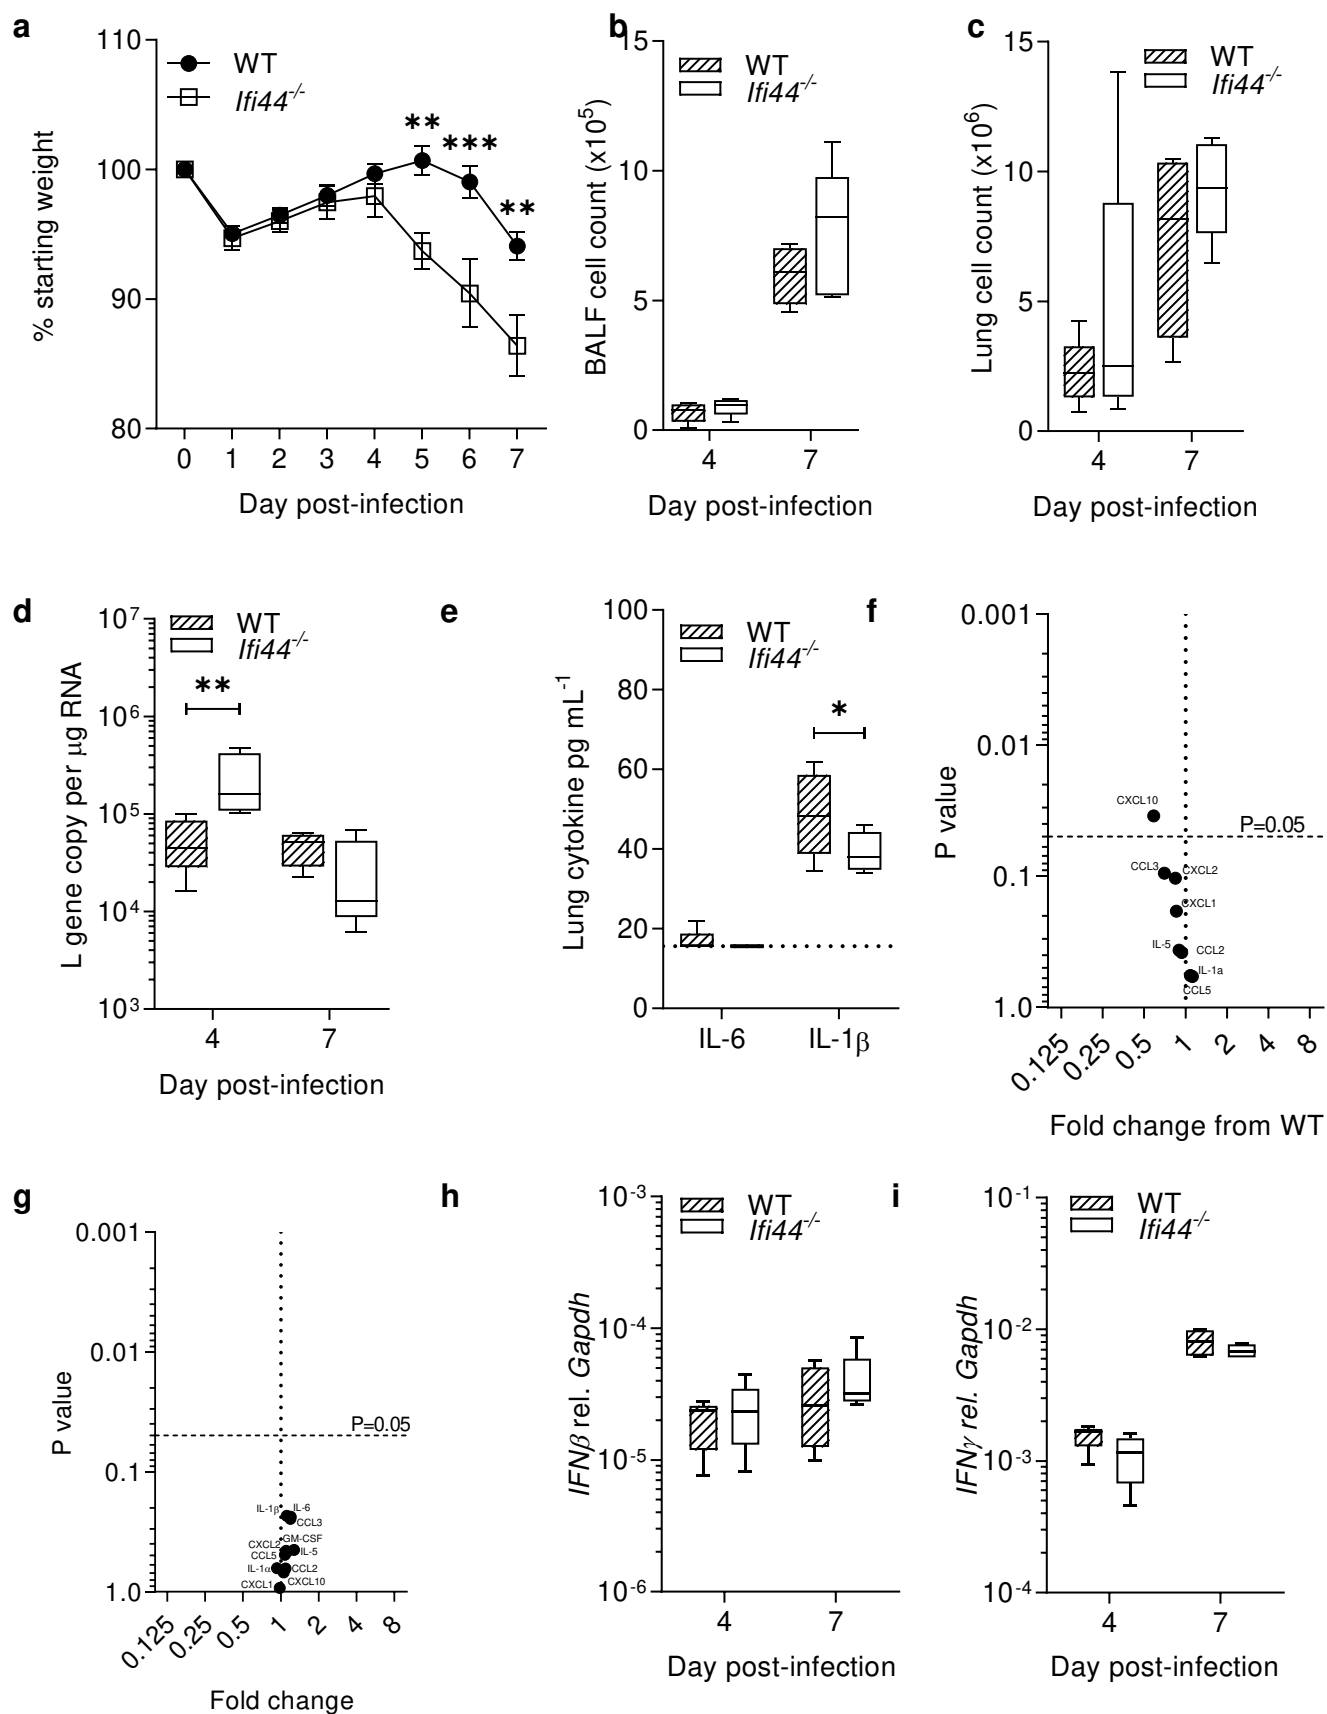

**Figure 7. RSV infection severity is enhanced in a *lfi44*<sup>-/-</sup> mouse model.** (a) Wildtype or *lfi44*<sup>-/-</sup> C57BL/6N mice were infected intranasally with 1 x 10<sup>5</sup> pfu RSV A2. Weight loss was monitored for 7 days. (b) BALF and (c) lung cell counts. (d) Viral load assessed by RSV L gene qPCR. (e) IL-6 and IL-1β levels at day 4 post-infection measured by ELISA. Volcano plot of inflammatory cytokines at day 4 (f) and day 7 (g) by multiplex ELISA. (h) *lfnβ* and (i) *lfnγ* mRNA relative to *Gapdh* (2<sup>-ΔCt</sup>). Box plots show a line at the median and box edges from the 25<sup>th</sup> to 75<sup>th</sup> percentiles, with whiskers from the 5<sup>th</sup> to 95<sup>th</sup> percentiles (Prism). N≥4 animals at each time point. Two independent experiments. Significance by ANOVA (a-e, h-i) or Student's T test (f-g). \* P < 0.05, \*\* 0.01, \*\*\* P < 0.001.
